# Supplementary material for: Design and Synthesis of New Modified Flexible Purine Bases as Potential Inhibitors of Human PNP
Source: MDPI journal article supplement (doi:10.3390/molecules28030928), 2023-01-17

## Supplementary Materials

### Design and synthesis of new modified flexible purine bases as potential inhibitors of Human PNP

Anastasia Khandazhinskaya<sup>1</sup>, Ilja Fateev<sup>2</sup>, Anna Maslova<sup>1</sup>, Barbara Eletskaia<sup>2</sup>, Irina Konstantinova<sup>2</sup>, Katerine Seley-Radtke<sup>3</sup>, Sergey Kochetkov<sup>1</sup>, Elena Matyugina<sup>1</sup>

<sup>1</sup>*Engelhardt Institute of Molecular Biology of the Russian Academy of Sciences, 32 Vavilov St., Moscow 119991, Russia*

<sup>2</sup>*Shemyakin-Ovchinnikov Institute of Bioorganic Chemistry, Russian Academy of Sciences, Moscow 117997, Russia*

<sup>3</sup>*Department of Chemistry & Biochemistry, University of Maryland, Baltimore County, Baltimore, MD, USA*

### Content

<sup>1</sup>H-NMR and <sup>13</sup>C-NMR spectra (300 MHz, CDCl<sub>3</sub>) of target products.

HRMS spectra of compounds target products.

Figure S1: Lineweaver–Burk plots for the inosine phosphorolysis at concentrations of compounds 1, 2, 3 and 4 equal to 0, 0.5, 1 and 2 mM. (A) compound 1, (B) compound 2, (C) compound 3, (D) compound 4.

Figure S2: 2D diagrams of complexes PNP with various type of ligands.

Figure S3: Structure of the 3INY with re-docked 7-deazaguanine (An overlap the red wire – native ligand from PDB database; the red stick docked ligand. The box for docking ligands was highlighted in green (12 Å × 10 Å × 10 Å.)

<sup>1</sup>H-NMR spectrum (300 MHz, DMSO-d<sub>6</sub>) of compound **1**

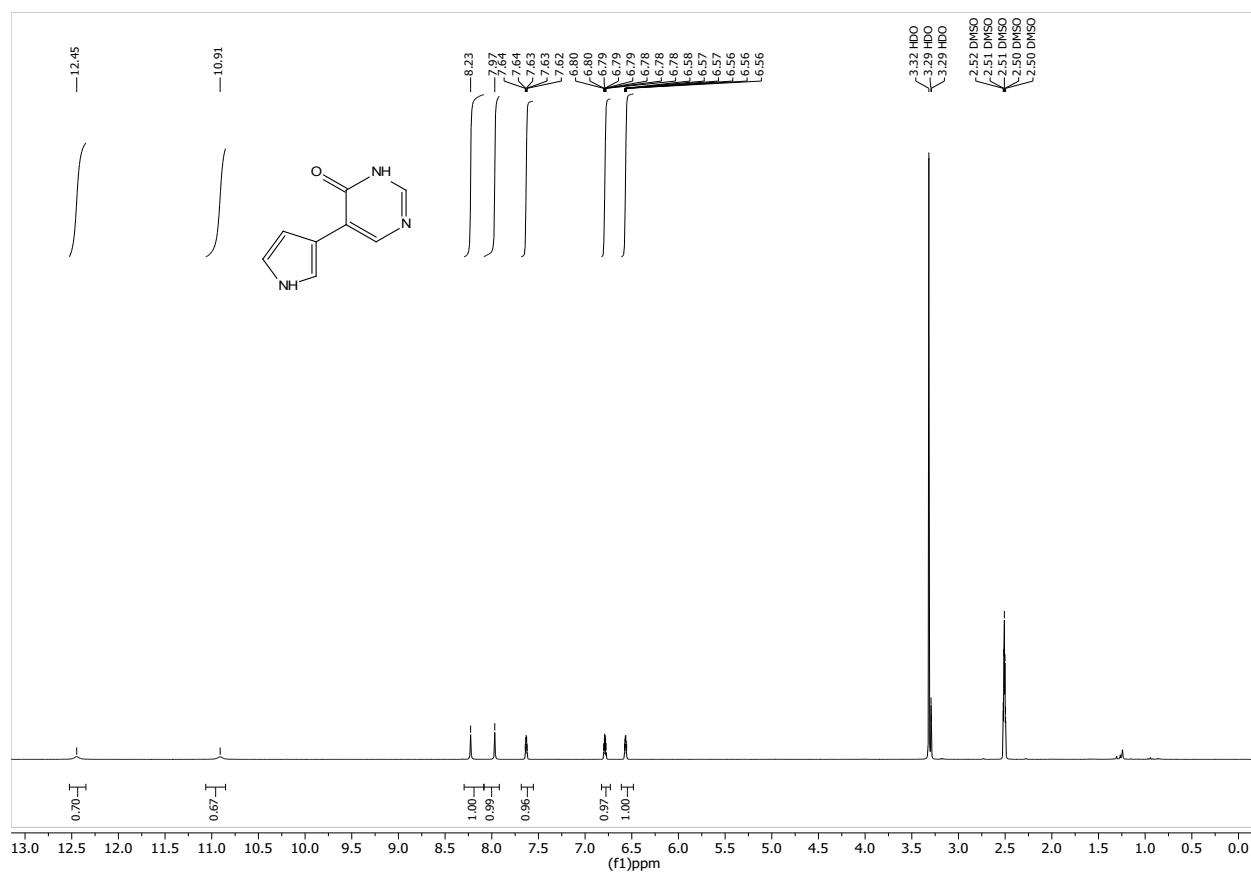

<sup>13</sup>C-NMR spectrum (75.5 MHz, DMSO-d<sub>6</sub>) of compound **1**

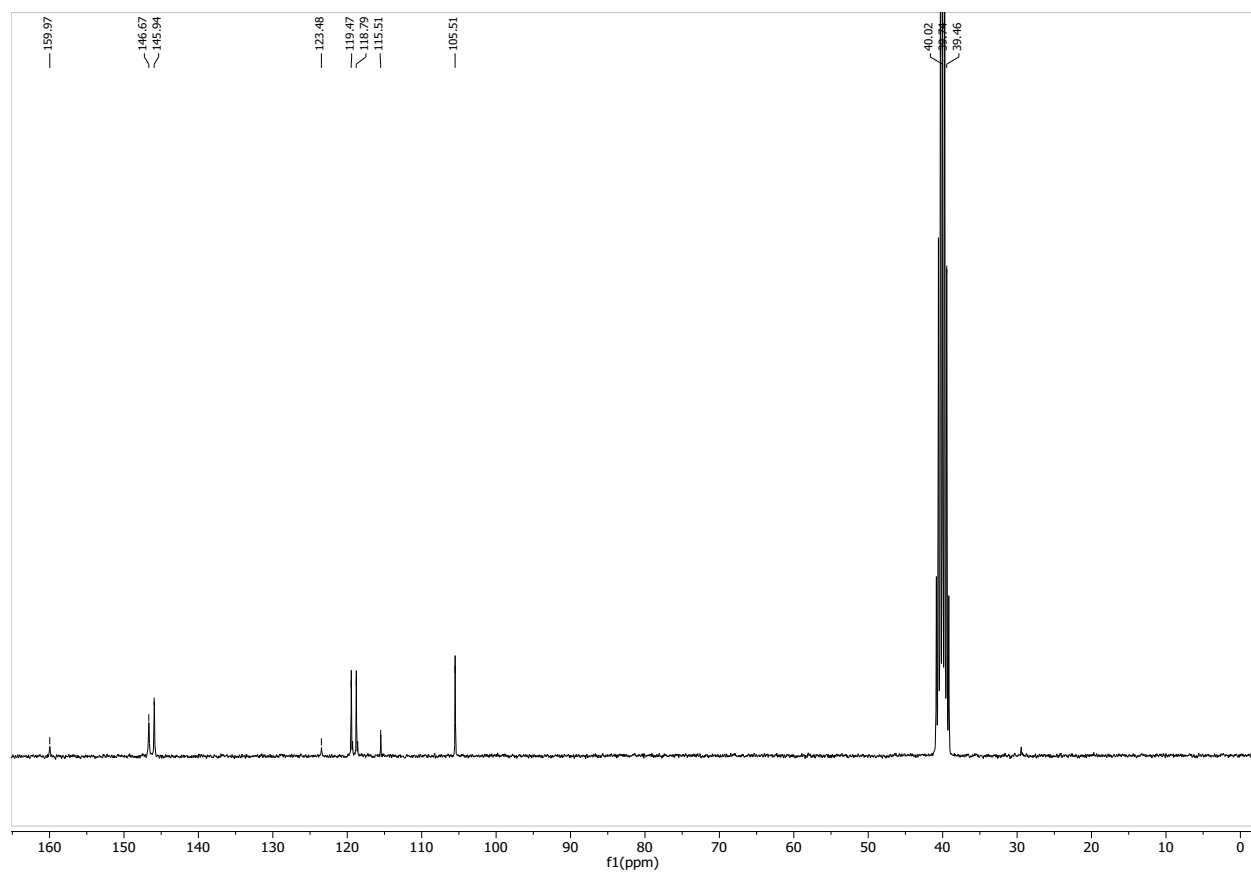

$^1\text{H}$ -NMR spectrum (300 MHz,  $\text{CD}_3\text{OD}$ ) of compound **2**

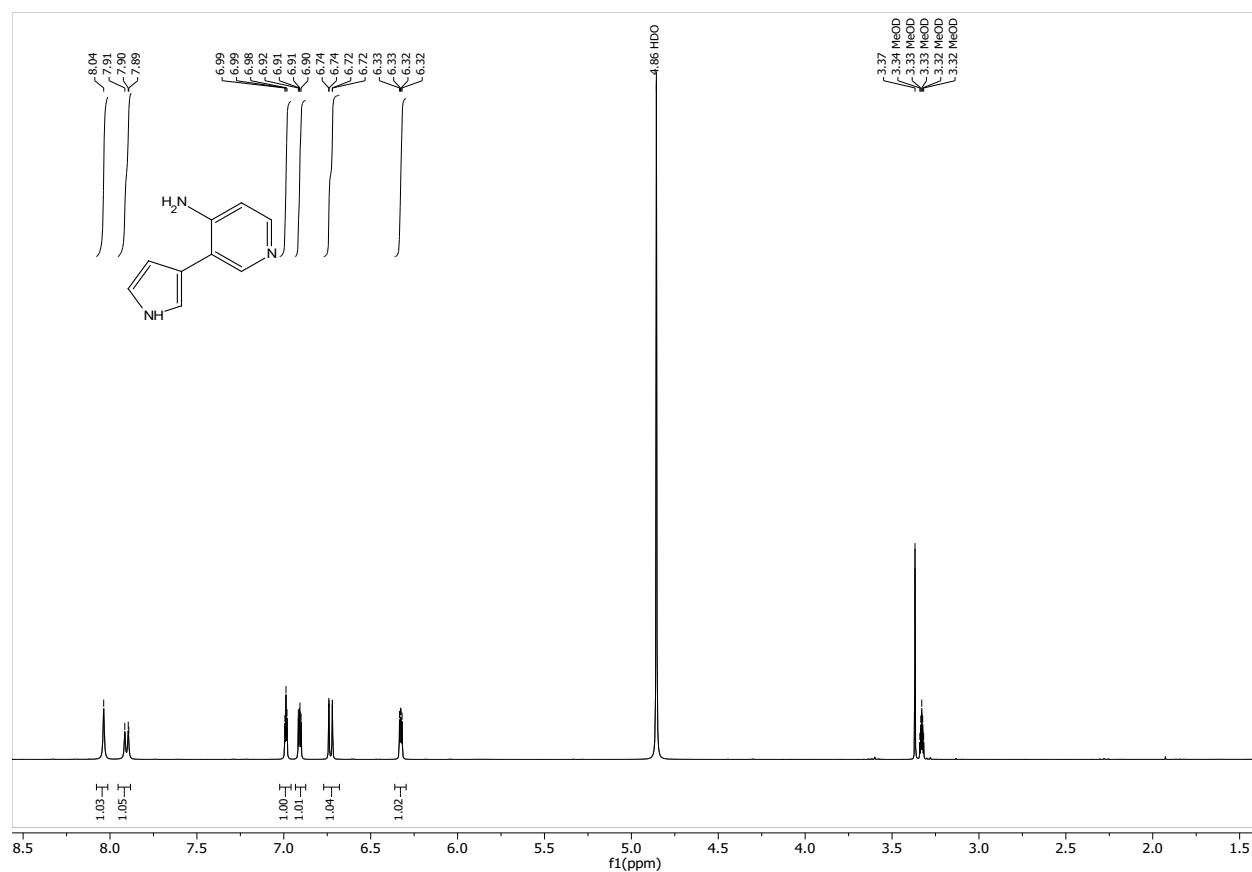

$^{13}\text{C}$ -NMR spectrum (75.5 MHz,  $\text{CD}_3\text{OD}$ ) of compound **2**

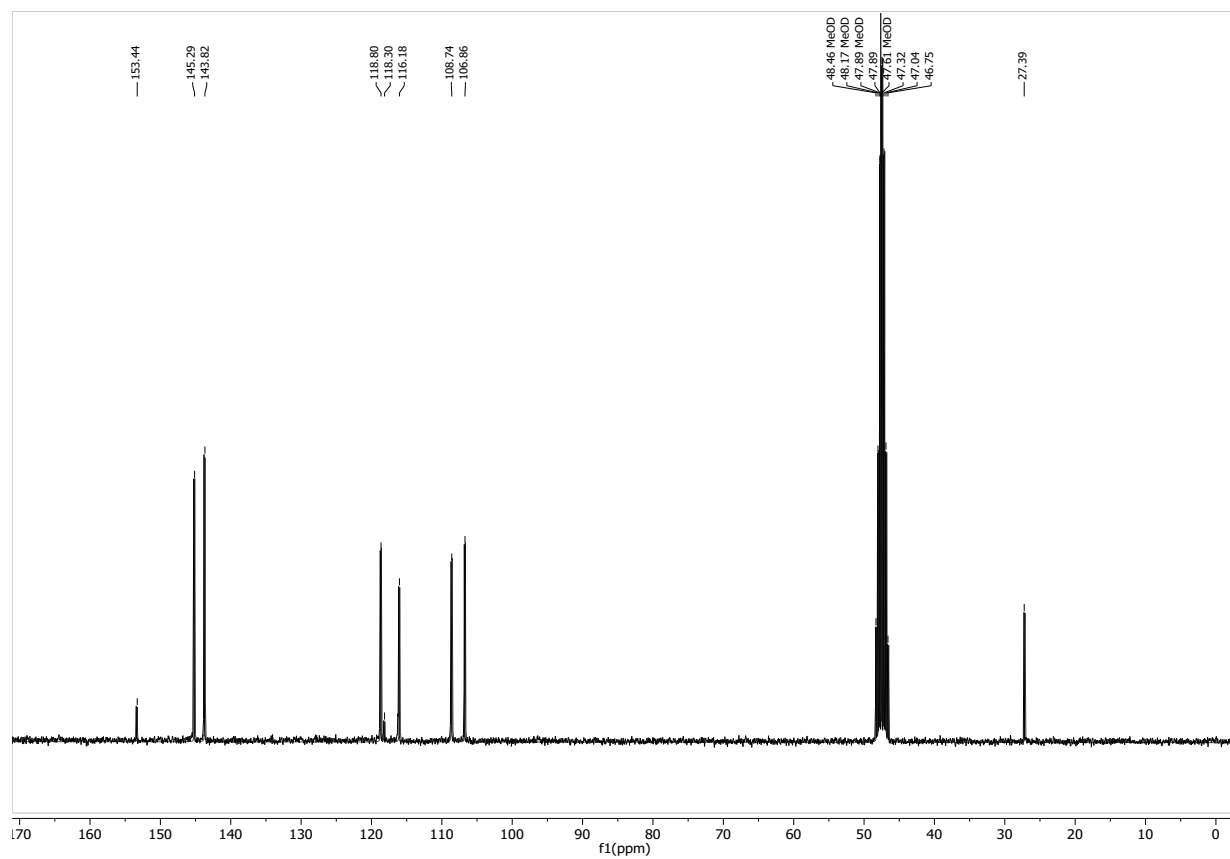

<sup>1</sup>H-NMR spectrum (300 MHz, DMSO-d<sub>6</sub>) of compound **3**

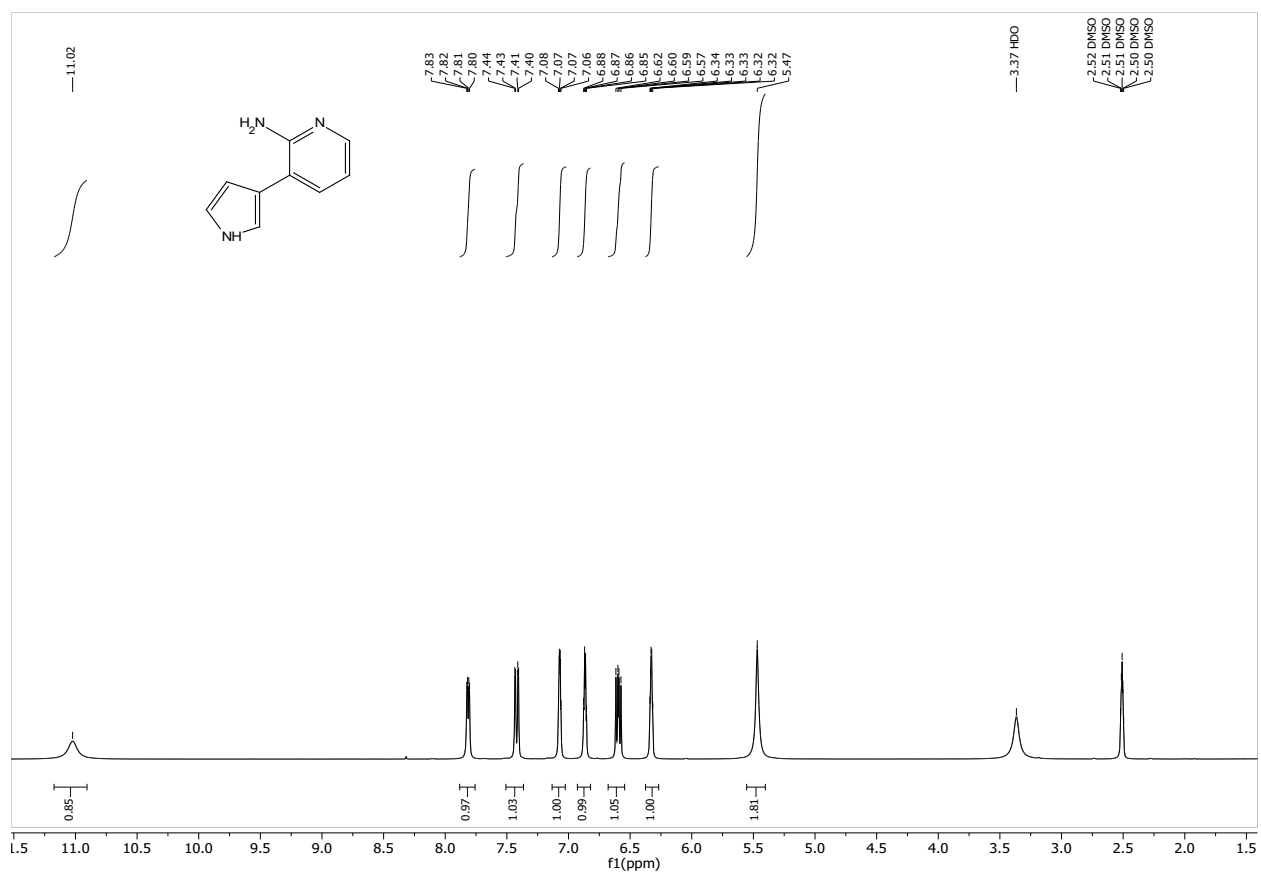

<sup>13</sup>C-NMR spectrum (75.5 MHz, DMSO-d<sub>6</sub>) of compound **3**

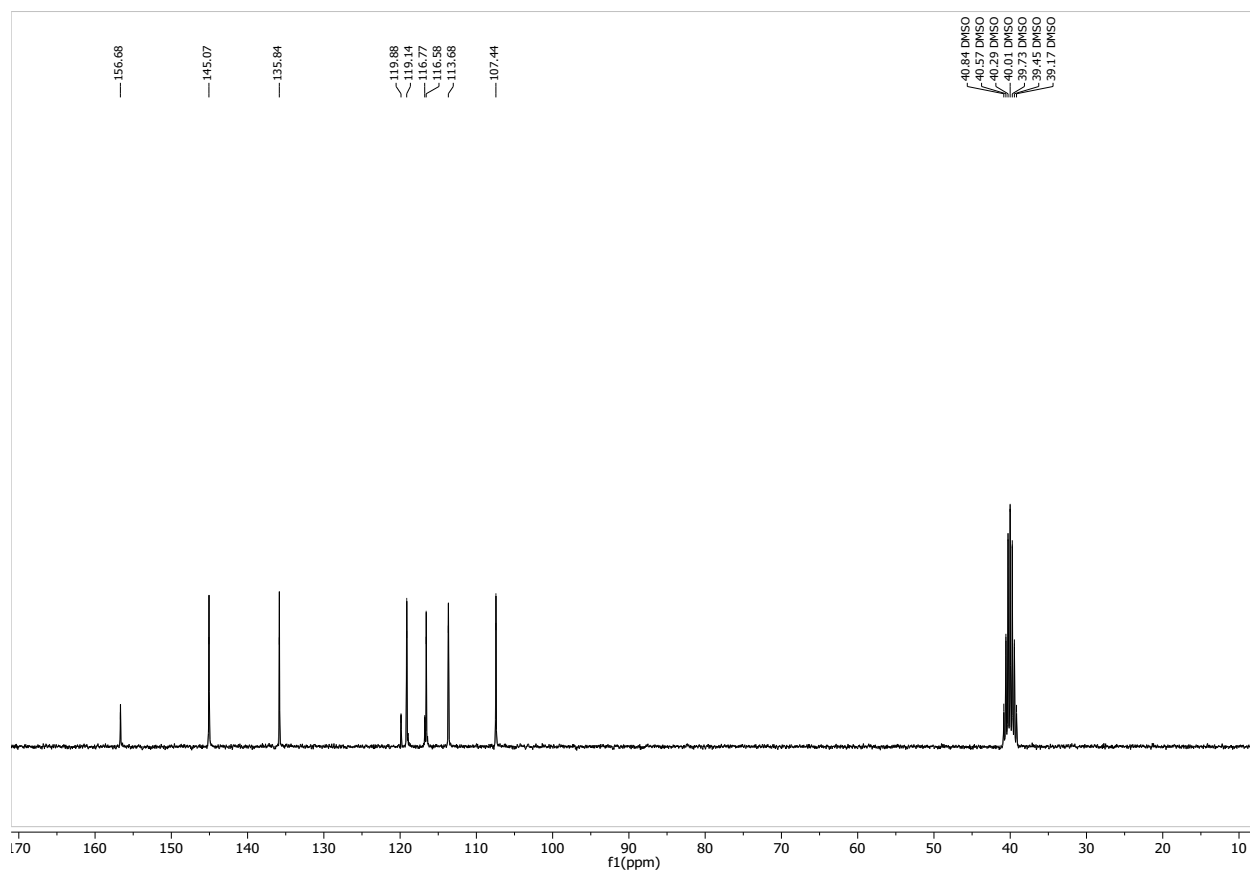

$^1\text{H}$ -NMR spectrum (300 MHz,  $\text{CDCl}_3\text{:CD}_3\text{OD}$ ) of compound **4**

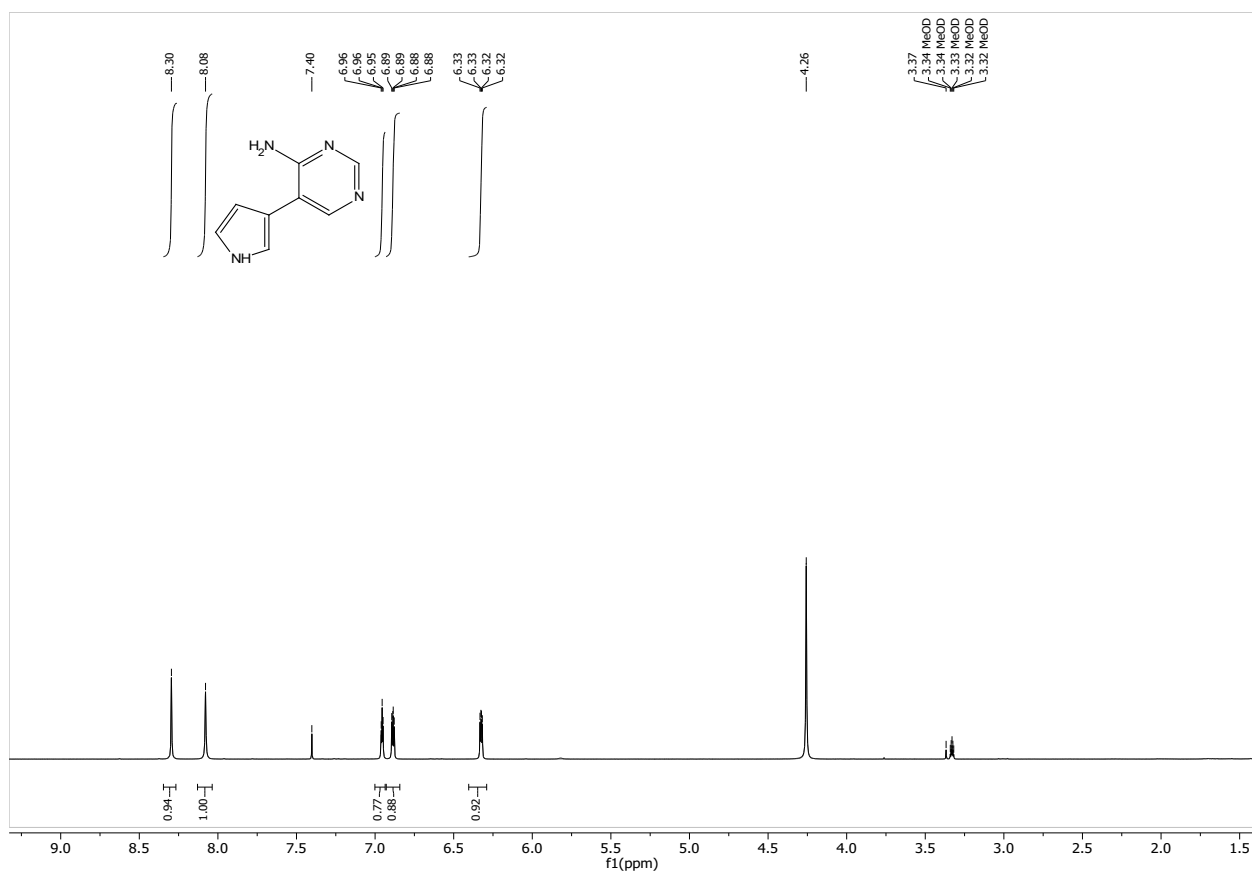

$^{13}\text{C}$ -NMR spectrum (75.5 MHz,  $\text{CDCl}_3\text{:CD}_3\text{OD}$ ) of compound **4**

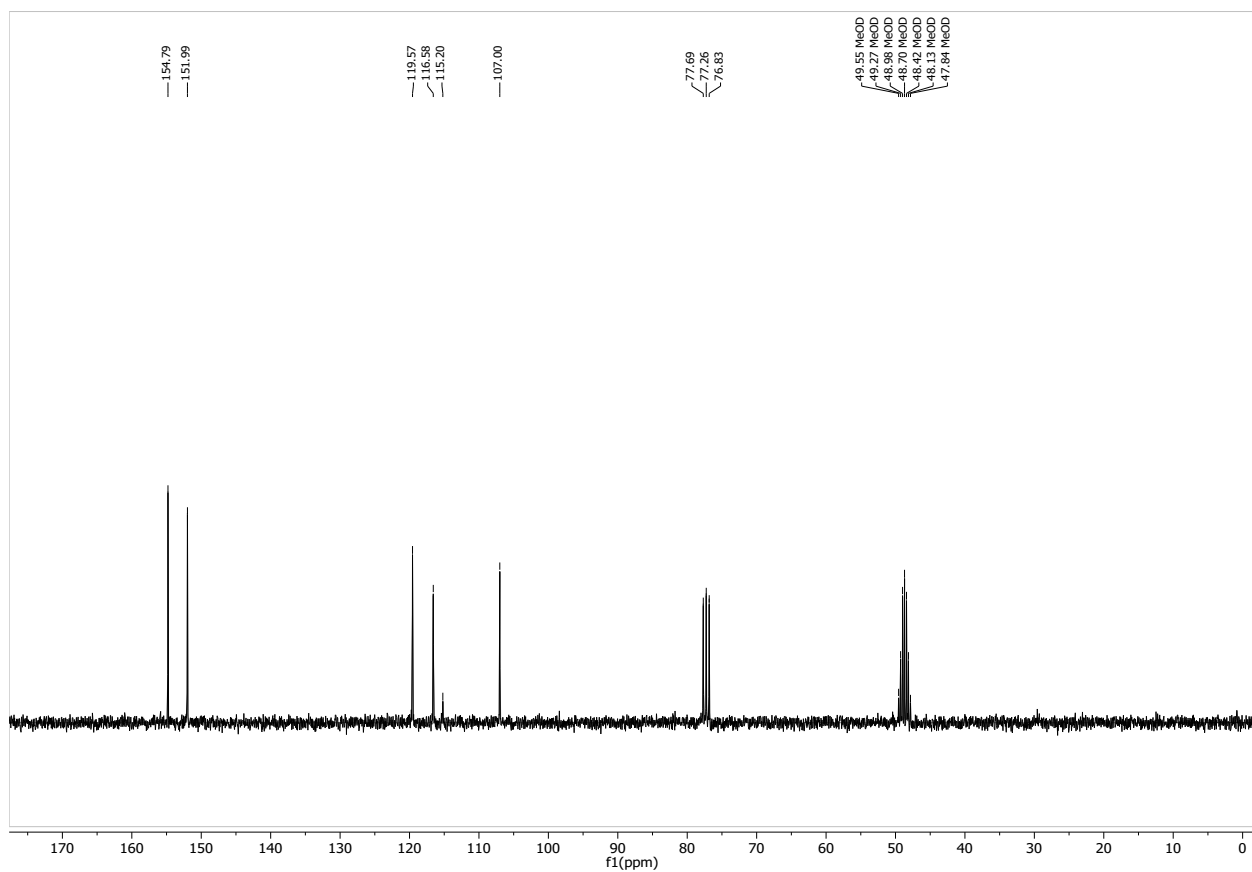

<sup>1</sup>H-NMR spectrum (300 MHz, CD<sub>3</sub>OD) of compound **13**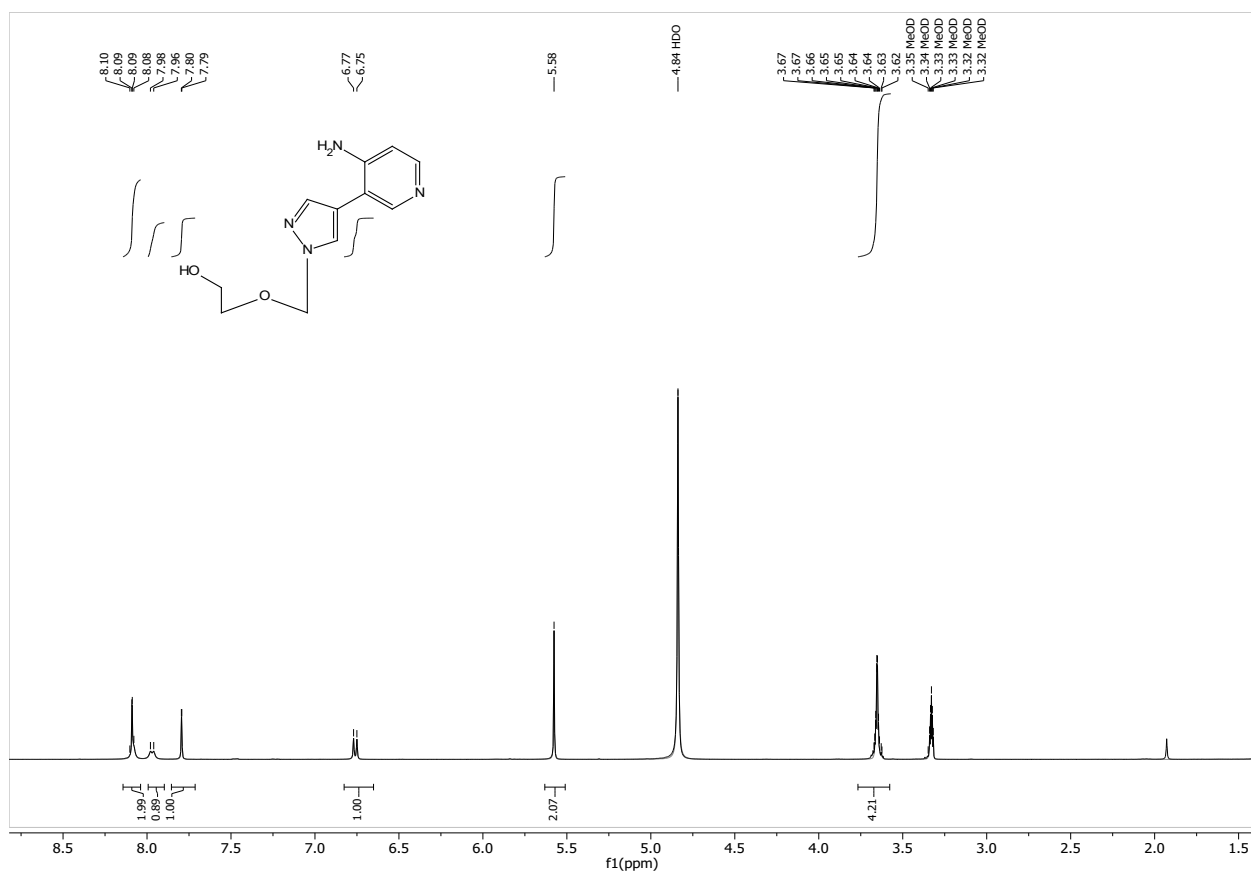

<sup>13</sup>C-NMR spectrum (75.5 MHz, CD<sub>3</sub>OD) of compound **13**

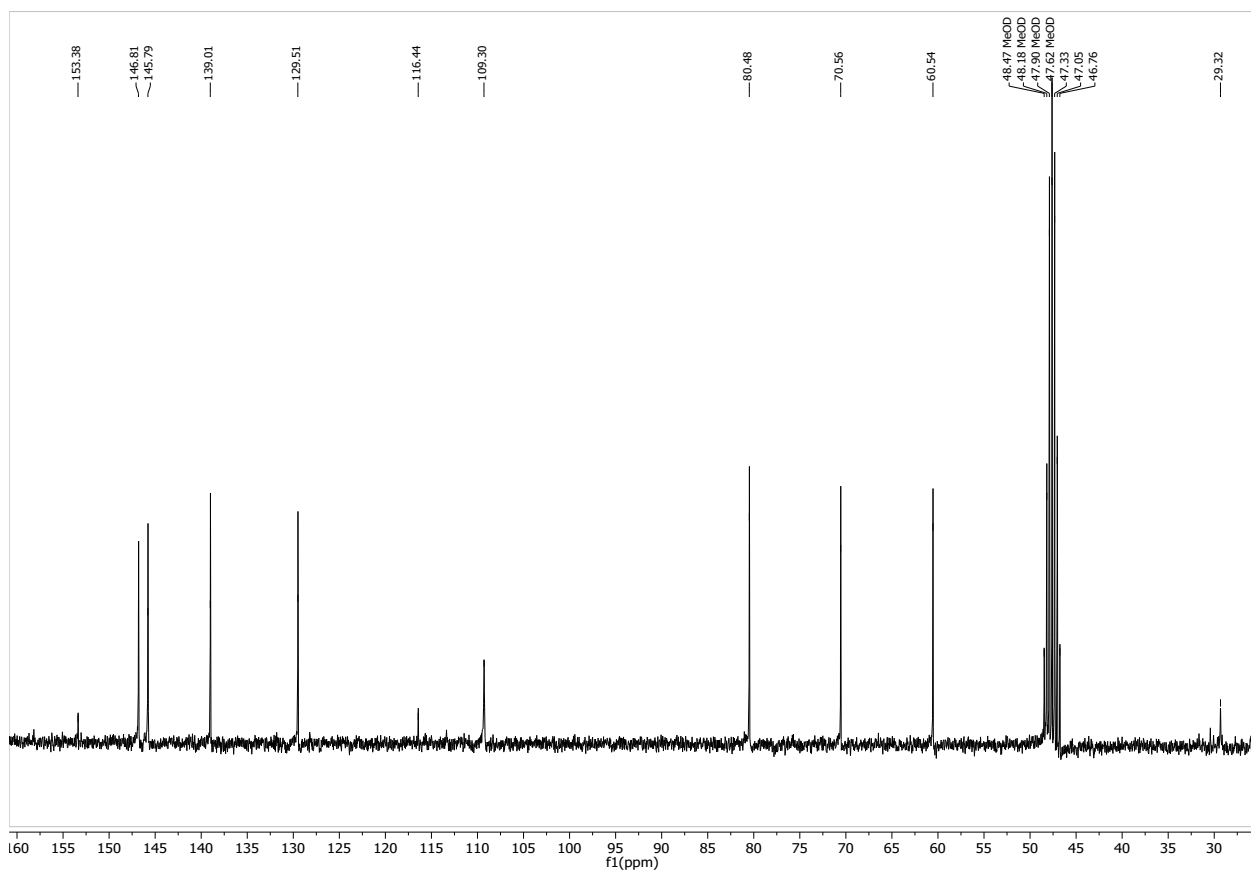

$^1\text{H}$ -NMR spectrum (300 MHz,  $\text{CD}_3\text{OD}$ ) of compound **14**

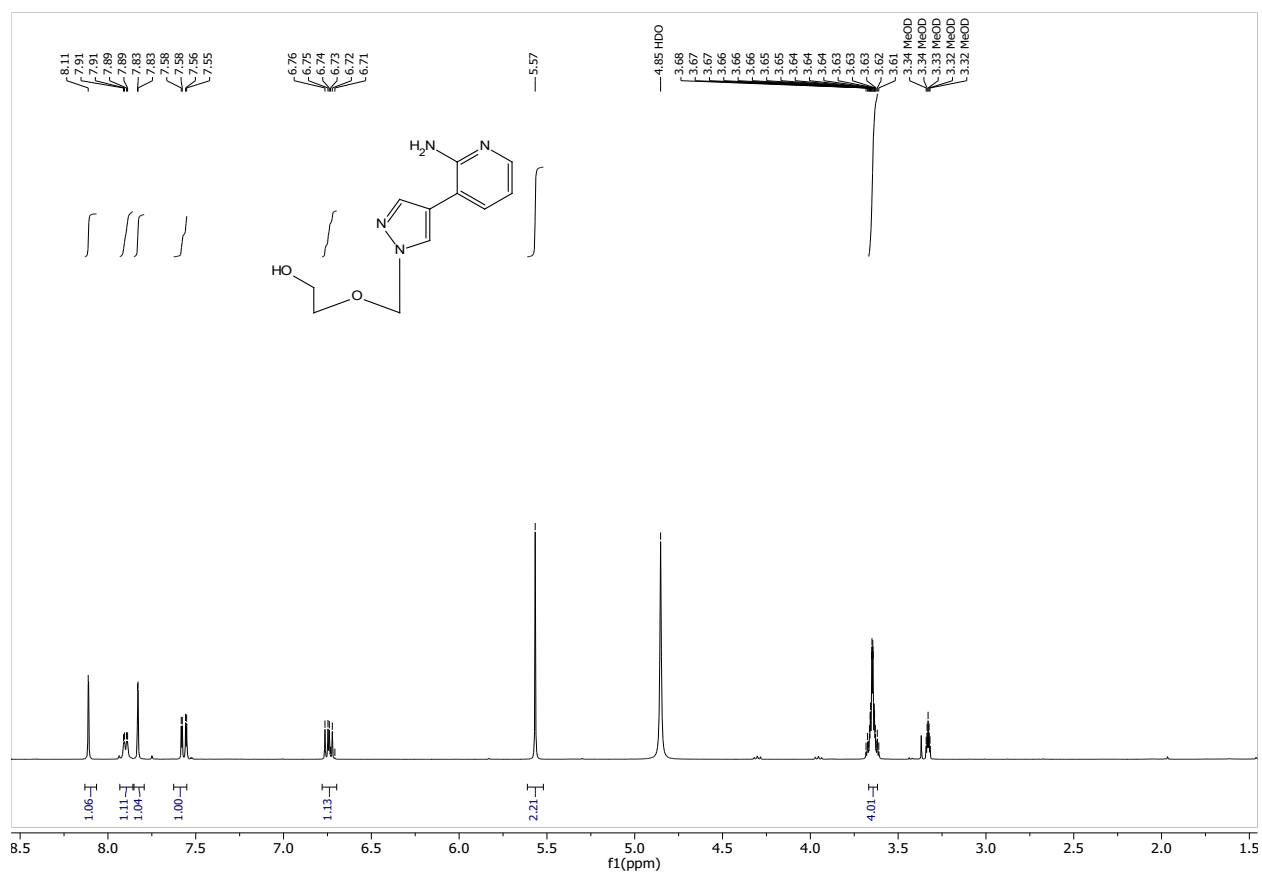

$^{13}\text{C}$ -NMR spectrum (75.5 MHz,  $\text{CD}_3\text{OD}$ ) of compound **14**

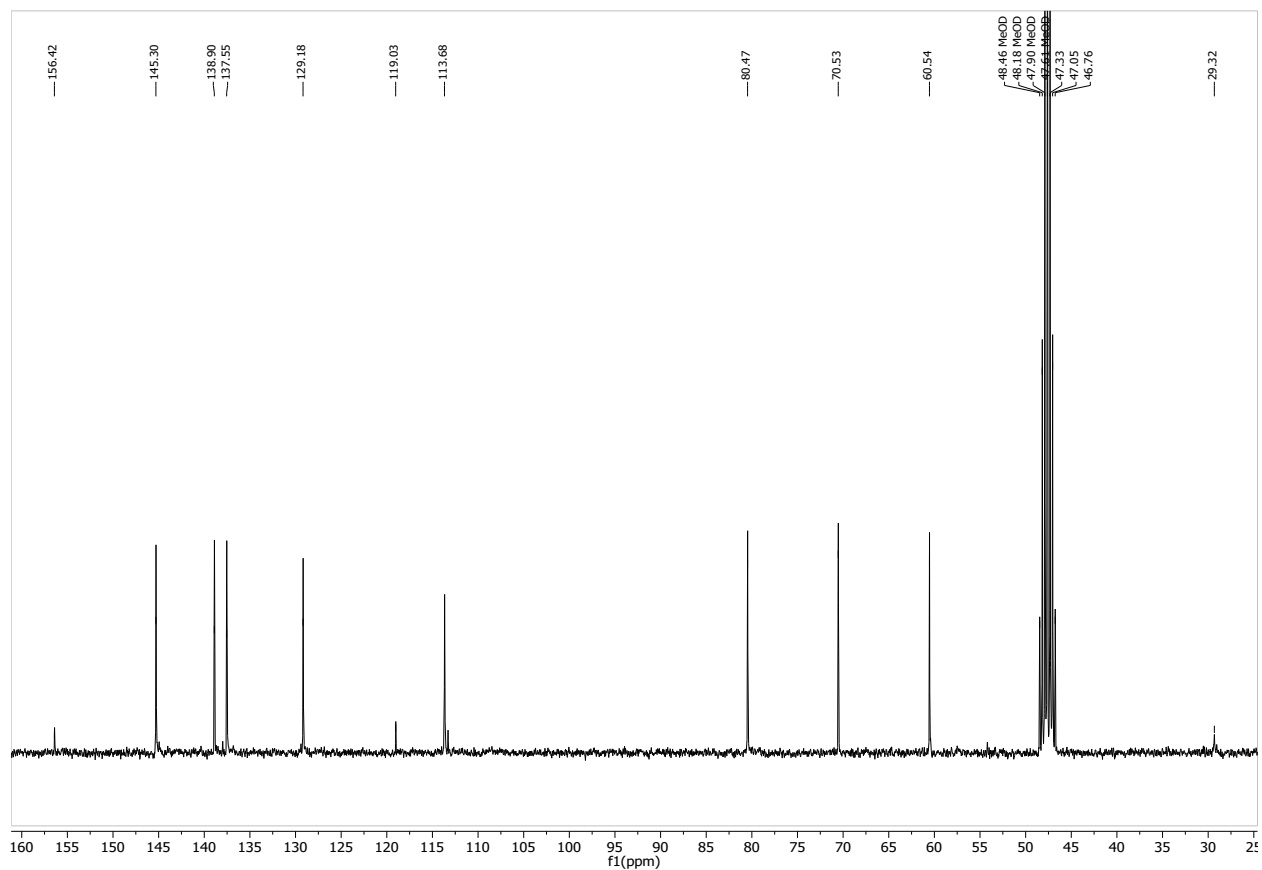

$^1\text{H}$ -NMR spectrum (300 MHz,  $\text{CD}_3\text{OD}$ ) of compound **15**

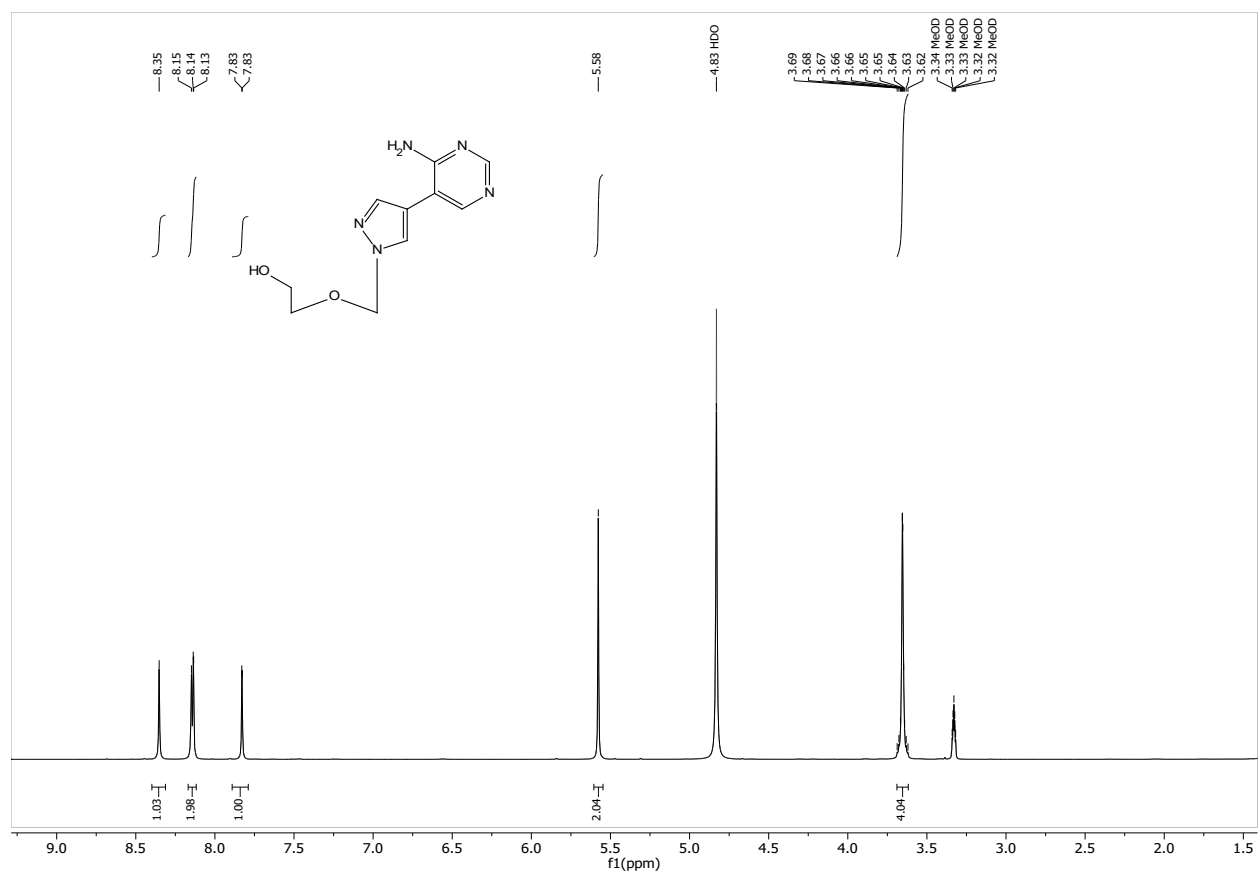

$^{13}\text{C}$ -NMR spectrum (75.5 MHz,  $\text{CD}_3\text{OD}$ ) of compound **15**

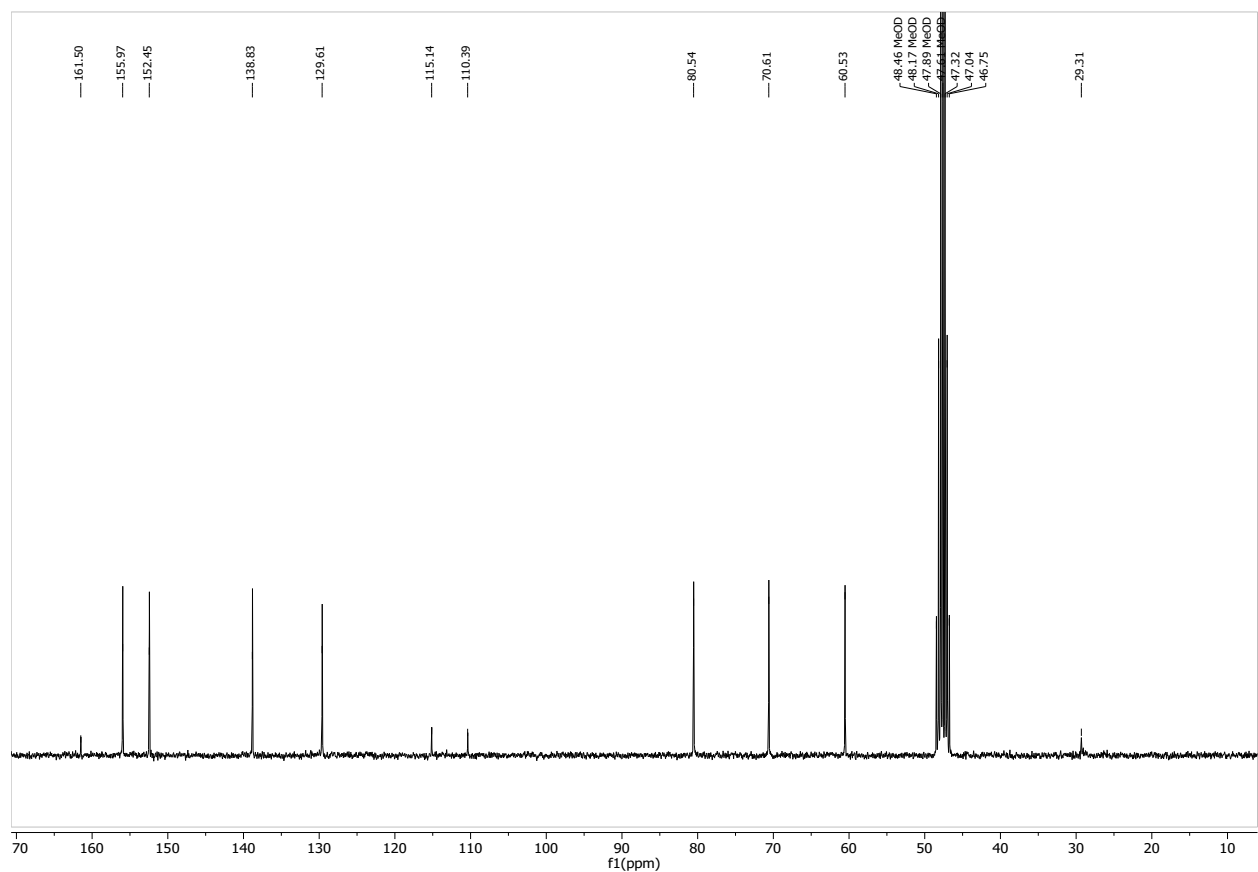



$^1\text{H}$ -NMR spectrum (300 MHz,  $\text{CD}_3\text{OD}$ ) of compound **16**

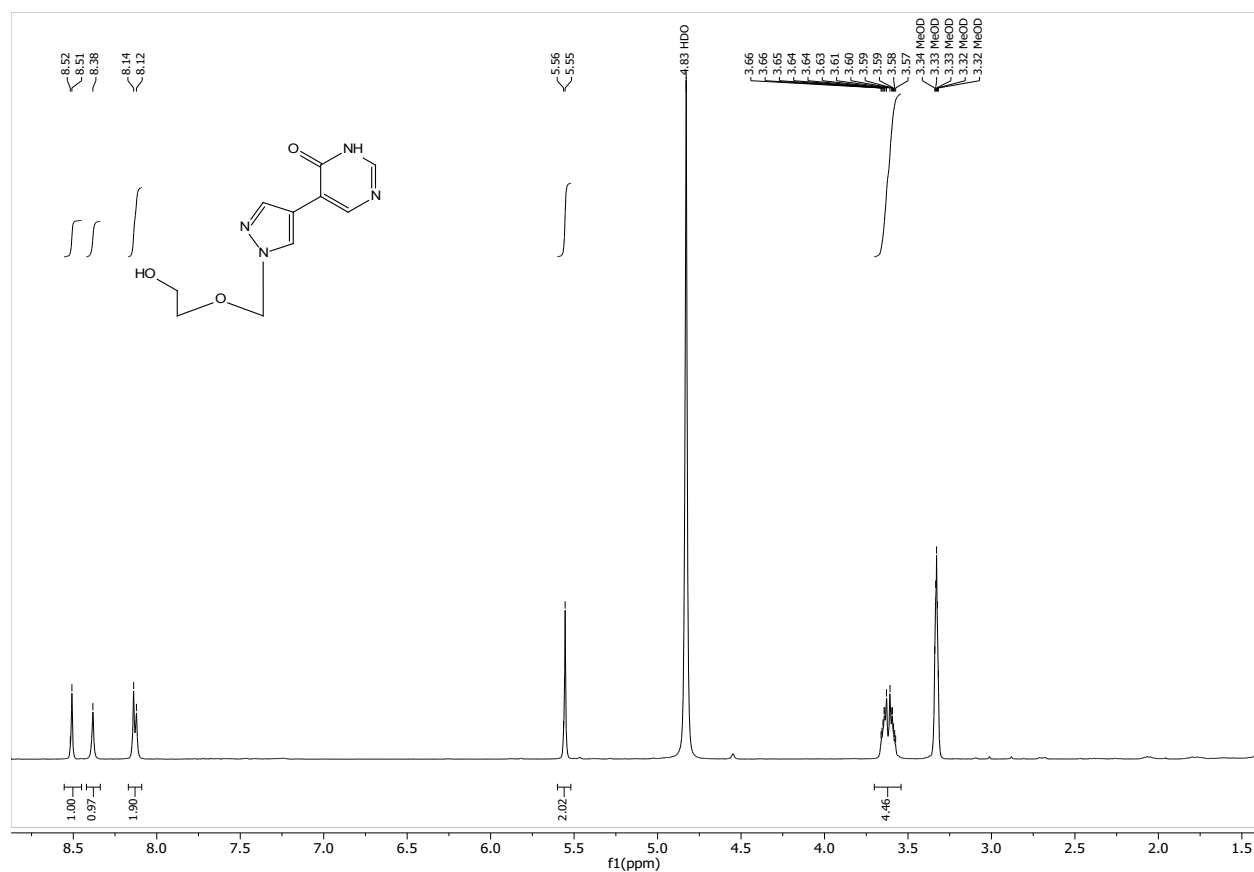

$^{13}\text{C}$ -NMR spectrum (75.5 MHz,  $\text{CD}_3\text{OD}$ ) of compound **16**

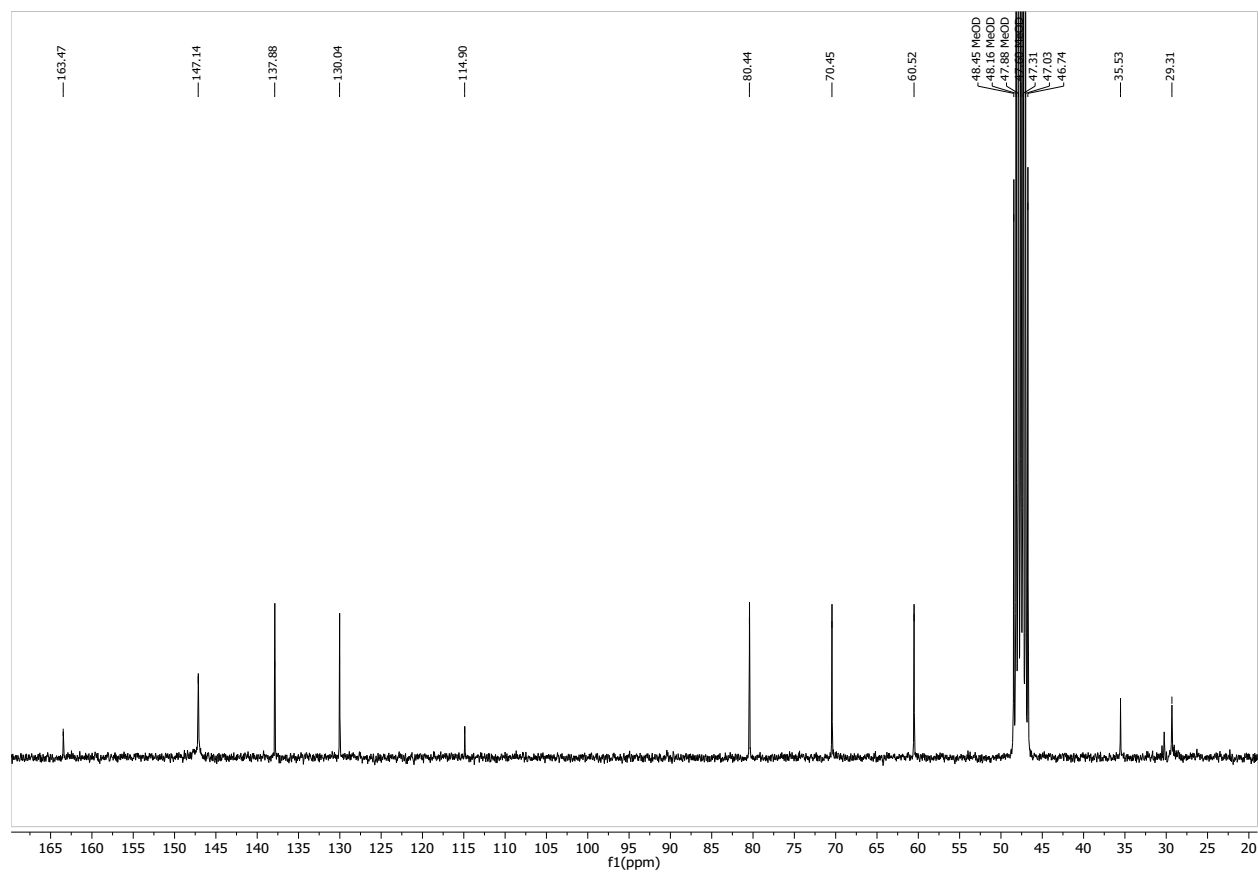

# HRMS spectrum of compound 1

## Display Report

### Analysis Info

Analysis Name D:\Data\Chizhov\IMB\Matyugina\1\ln260\_&clblow.d  
Method tune\_low\_1550.m  
Sample Name 1  
Comment CH3CN 100 %, dil. 200, calibrant added

Acquisition Date 25.01.2022 15:58:34

Operator BDAL@DE  
Instrument / Ser# maXis 43

### Acquisition Parameter

|             |            |                      |          |                  |           |
|-------------|------------|----------------------|----------|------------------|-----------|
| Source Type | ESI        | Ion Polarity         | Positive | Set Nebulizer    | 0.4 Bar   |
| Focus       | Not active |                      |          | Set Dry Heater   | 180 °C    |
| Scan Begin  | 50 m/z     | Set Capillary        | 4500 V   | Set Dry Gas      | 4.0 l/min |
| Scan End    | 1550 m/z   | Set End Plate Offset | -500 V   | Set Divert Valve | Source    |

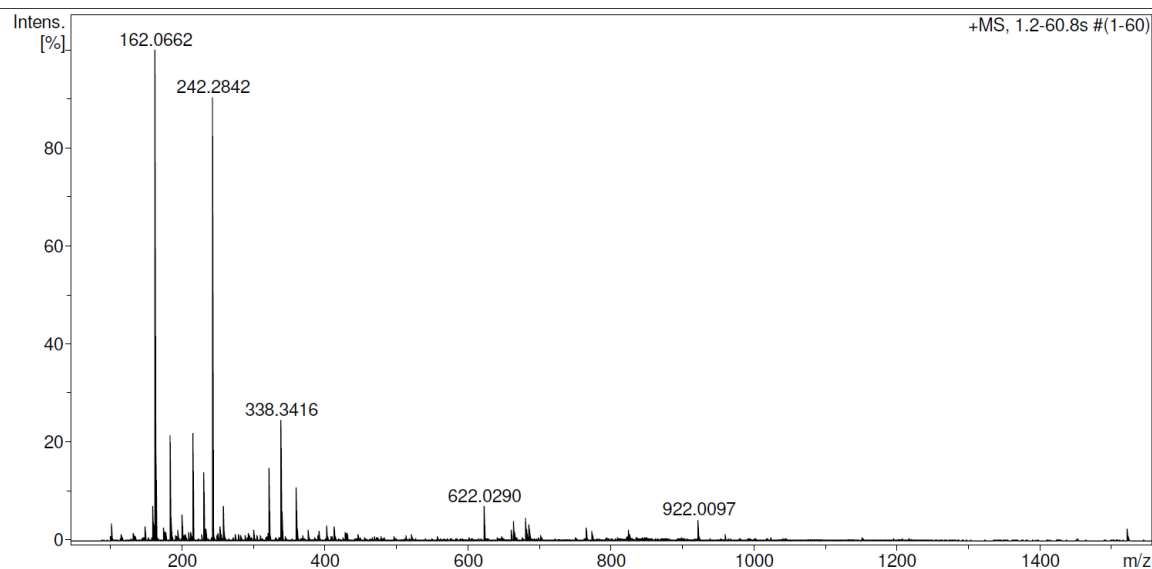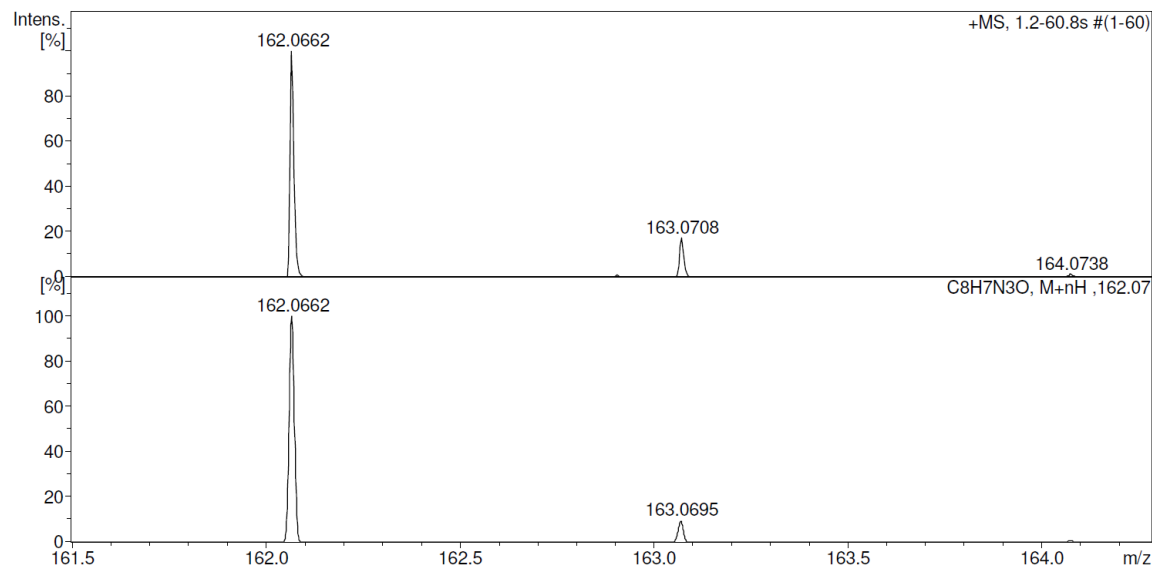

# HRMS spectrum of compound 2

## Display Report

### Analysis Info

Analysis Name D:\Data\EM-121 (LN-56)\_41\_01\_3936.d  
 Method la\_2.2\_small.m  
 Sample Name 2  
 Comment

Acquisition Date 12/27/2022 4:59:01 PM

Operator BDAL@DE  
 Instrument compact 8255754.20088

### Acquisition Parameter

|             |          |                      |          |                  |           |
|-------------|----------|----------------------|----------|------------------|-----------|
| Source Type | ESI      | Ion Polarity         | Positive | Set Nebulizer    | 0.4 Bar   |
| Focus       | Active   | Set Capillary        | 4500 V   | Set Dry Heater   | 180 °C    |
| Scan Begin  | 50 m/z   | Set End Plate Offset | -500 V   | Set Dry Gas      | 6.0 l/min |
| Scan End    | 3000 m/z | Set Charging Voltage | 2000 V   | Set Divert Valve | Source    |
|             |          | Set Corona           | 0 nA     | Set APCI Heater  | 0 °C      |

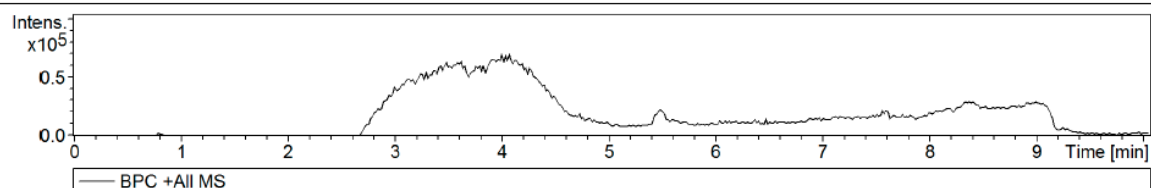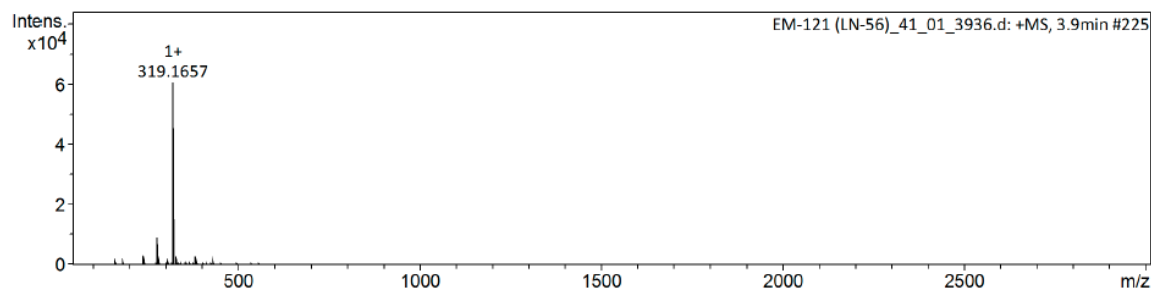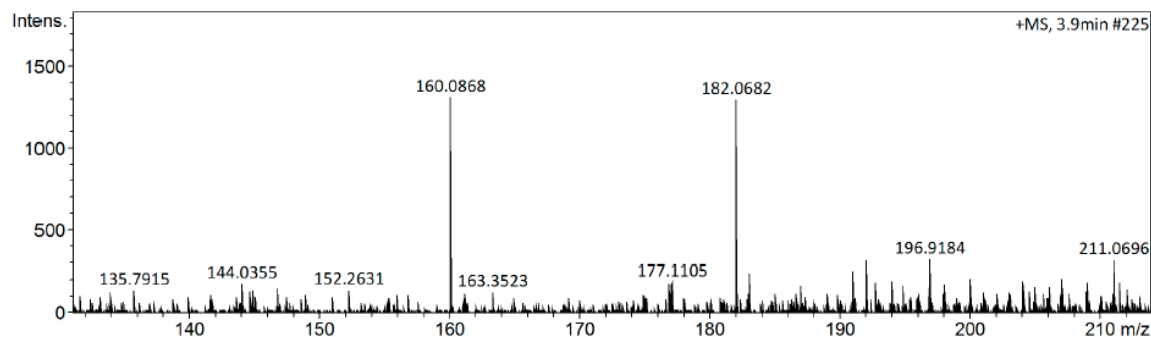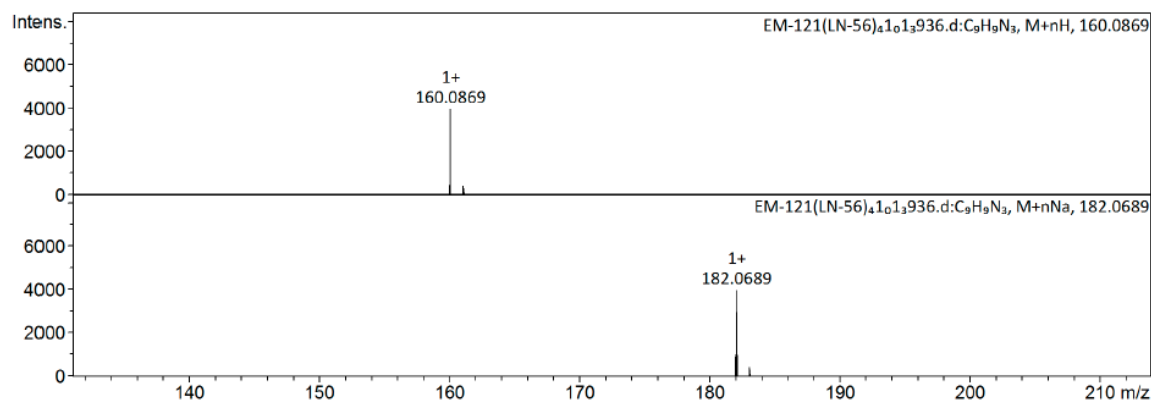

EM-121 (LN-56)\_41\_01\_3936.d

Bruker Compass DataAnalysis 4.3

printed: 12/27/2022 8:08:31 PM

by: BDAL@DE

Page 1 of 1

# HRMS spectrum of compound 3

## Display Report

### Analysis Info

Analysis Name D:\Data\Chizhov\IMB\Matyugina\1\ln272\_&clblow.d  
 Method tune\_low\_1550.m  
 Sample Name 3  
 Comment CH3CN 100 %, dil. 2000, calibrant added

Acquisition Date 25.01.2022 16:05:20

Operator BDAL@DE

Instrument / Ser# maXis 43

### Acquisition Parameter

|             |            |                      |          |                  |           |
|-------------|------------|----------------------|----------|------------------|-----------|
| Source Type | ESI        | Ion Polarity         | Positive | Set Nebulizer    | 0.4 Bar   |
| Focus       | Not active |                      |          | Set Dry Heater   | 180 °C    |
| Scan Begin  | 50 m/z     | Set Capillary        | 4500 V   | Set Dry Gas      | 4.0 l/min |
| Scan End    | 1550 m/z   | Set End Plate Offset | -500 V   | Set Divert Valve | Source    |

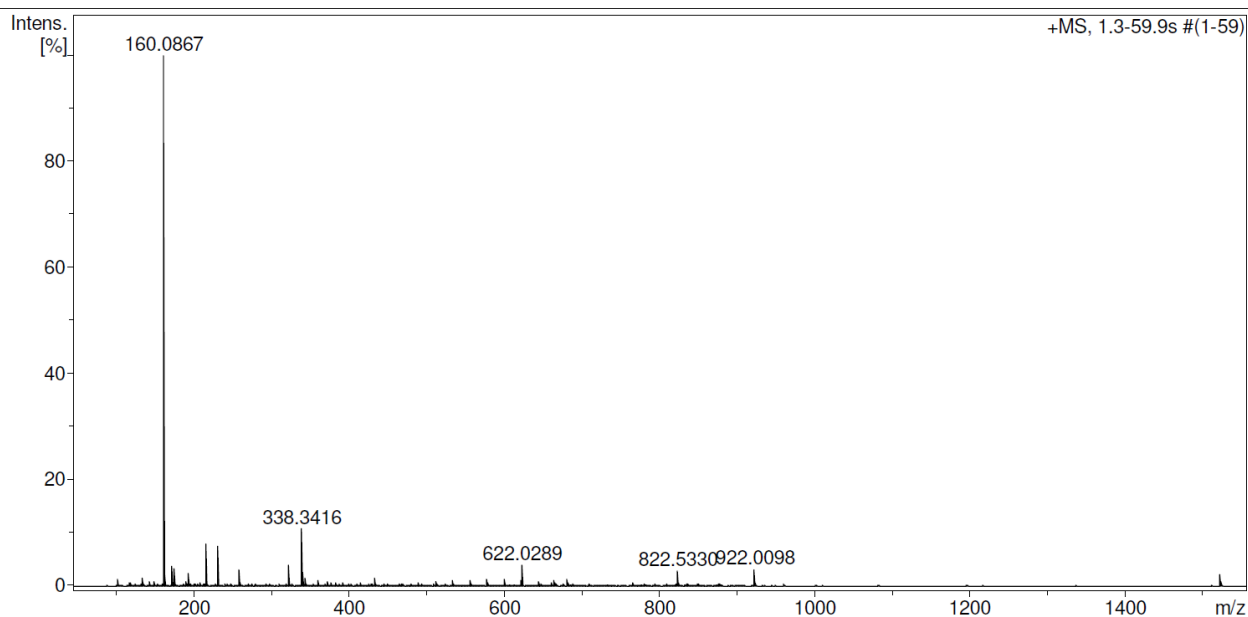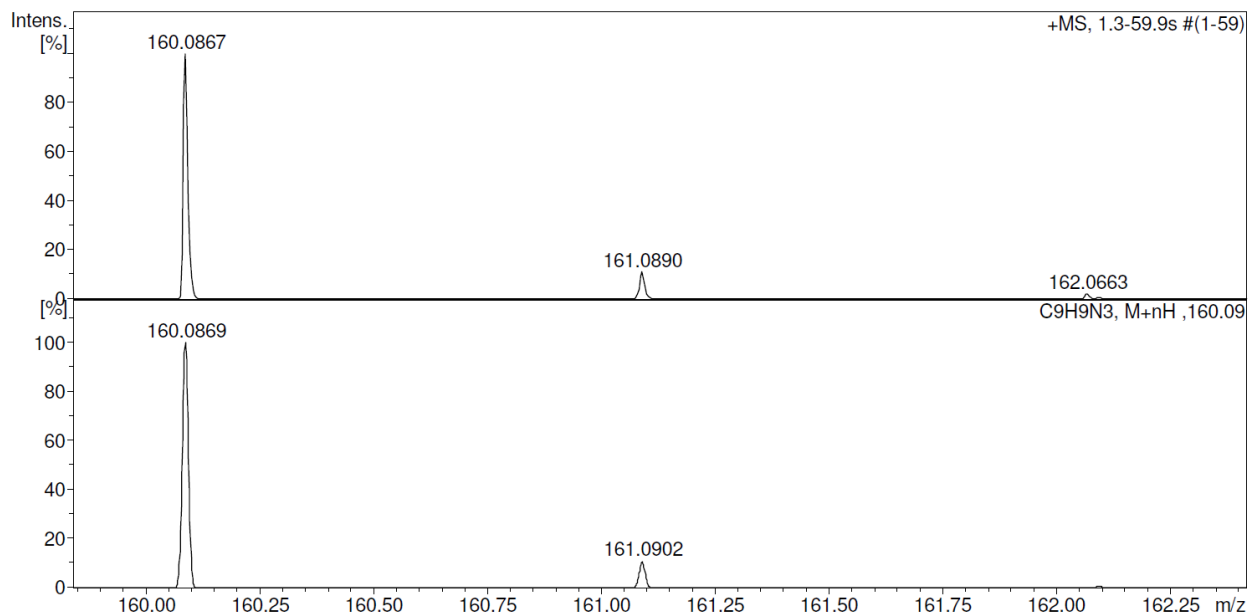

# HRMS spectrum of compound 4

## Display Report

### Analysis Info

Analysis Name D:\Data\Chizhov\IMB\Matyugina\1\In205\_&clblow.d  
 Method tune\_low\_1550.m  
 Sample Name 4  
 Comment CH3CN 100 %, dil. 2000, calibrant added

Acquisition Date 25.01.2022 15:51:54

Operator BDAL@DE

Instrument / Ser# maXis 43

### Acquisition Parameter

|             |            |                      |          |                  |           |
|-------------|------------|----------------------|----------|------------------|-----------|
| Source Type | ESI        | Ion Polarity         | Positive | Set Nebulizer    | 0.4 Bar   |
| Focus       | Not active |                      |          | Set Dry Heater   | 180 °C    |
| Scan Begin  | 50 m/z     | Set Capillary        | 4500 V   | Set Dry Gas      | 4.0 l/min |
| Scan End    | 1550 m/z   | Set End Plate Offset | -500 V   | Set Divert Valve | Source    |

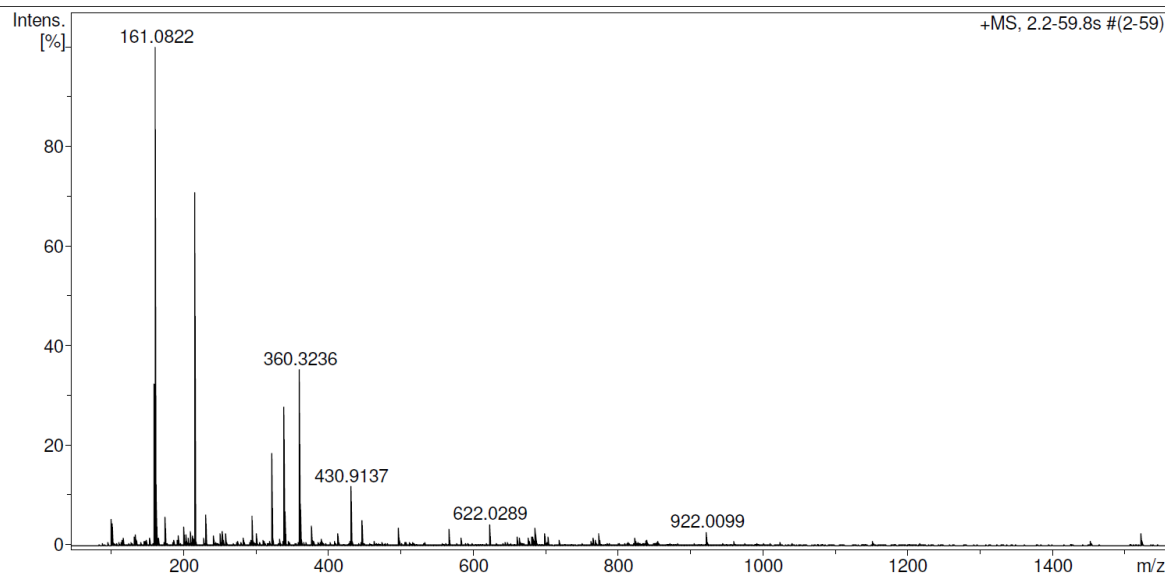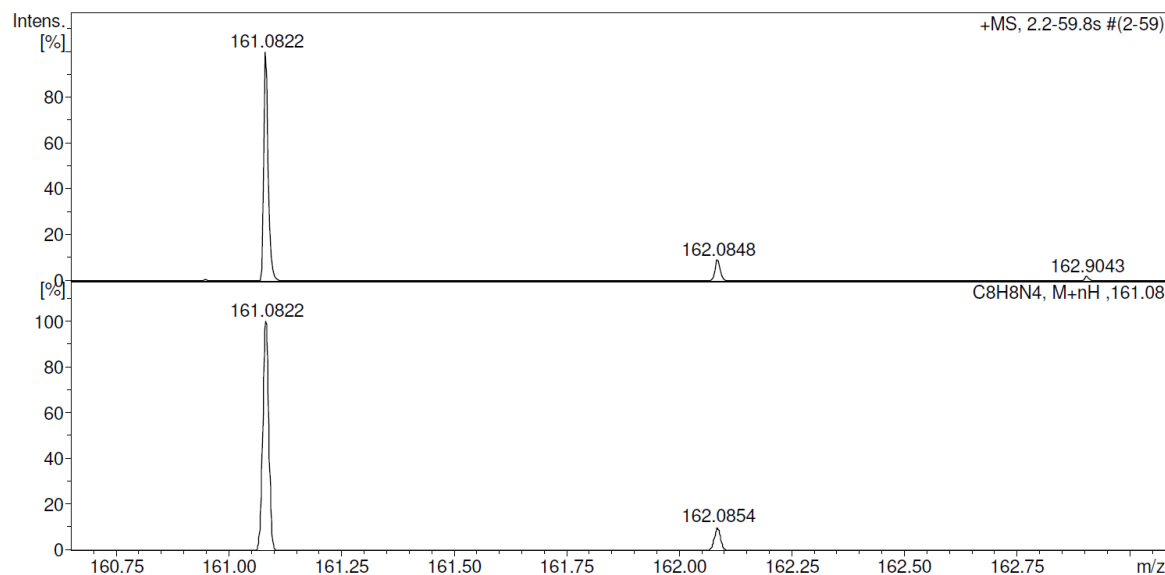

# HRMS spectrum of compound 13

## Display Report

### Analysis Info

Analysis Name D:\Data\EN-116 (LN-293)\_8\_01\_3908.d  
 Method la\_2.2\_small.m  
 Sample Name 13  
 Comment

Acquisition Date 11/30/2022 8:25:15 PM

Operator BDAL@DE  
 Instrument compact 8255754.20088

### Acquisition Parameter

|             |          |                      |          |                  |           |
|-------------|----------|----------------------|----------|------------------|-----------|
| Source Type | ESI      | Ion Polarity         | Positive | Set Nebulizer    | 0.4 Bar   |
| Focus       | Active   | Set Capillary        | 4500 V   | Set Dry Heater   | 180 °C    |
| Scan Begin  | 50 m/z   | Set End Plate Offset | -500 V   | Set Dry Gas      | 6.0 l/min |
| Scan End    | 3000 m/z | Set Charging Voltage | 2000 V   | Set Divert Valve | Source    |
|             |          | Set Corona           | 0 nA     | Set APCI Heater  | 0 °C      |

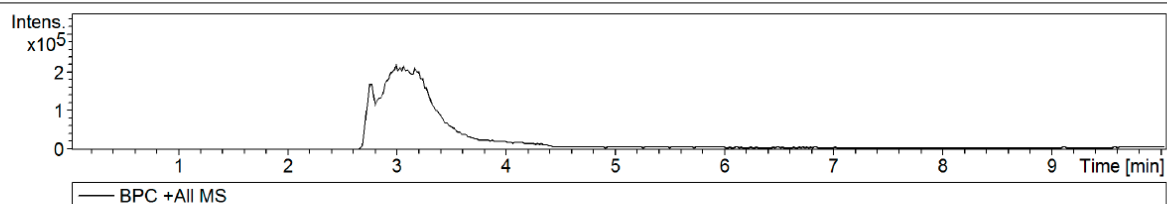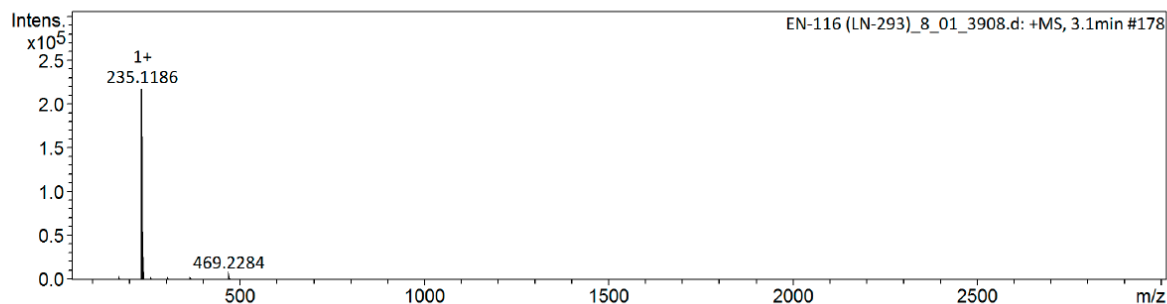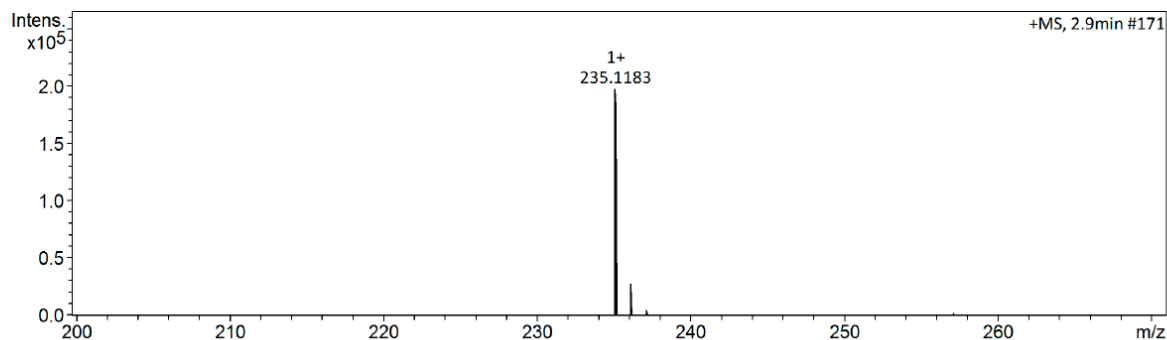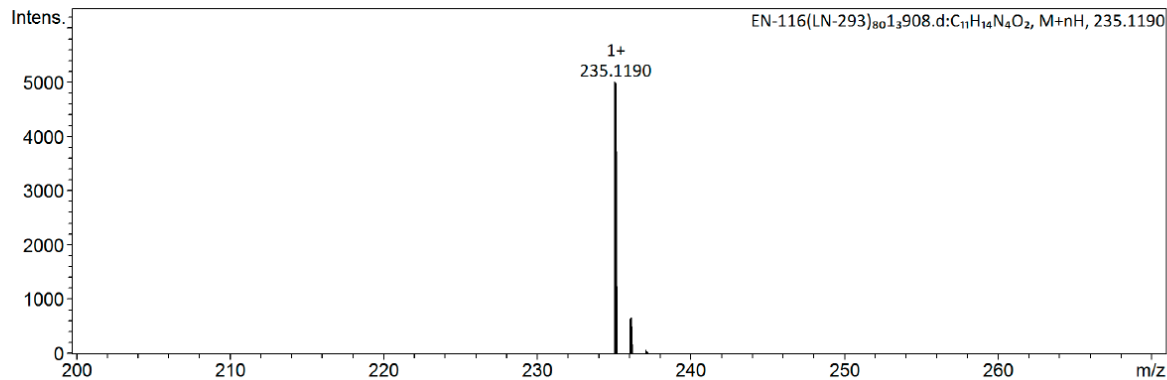

# HRMS spectrum of compound 14

## Display Report

### Analysis Info

Analysis Name: D:\Data\Chizhov\IMB\Matyugina\Oct\_21\_2022\In-266\_&clblow.d  
 Method: tune\_low.m  
 Sample Name: 14  
 Comment: 100 %, dil. 2000, calibrant added

Acquisition Date: 21.10.2022 14:12:12  
 Operator: BDAL@DE  
 Instrument / Ser#: microTOF CH3CN 10248

### Acquisition Parameter

|             |            |                      |          |                  |           |
|-------------|------------|----------------------|----------|------------------|-----------|
| Source Type | ESI        | Ion Polarity         | Positive | Set Nebulizer    | 0.4 Bar   |
| Focus       | Not active |                      |          | Set Dry Heater   | 180 °C    |
| Scan Begin  | 50 m/z     | Set Capillary        | 4500 V   | Set Dry Gas      | 4.0 l/min |
| Scan End    | 3000 m/z   | Set End Plate Offset | -500 V   | Set Divert Valve | Waste     |

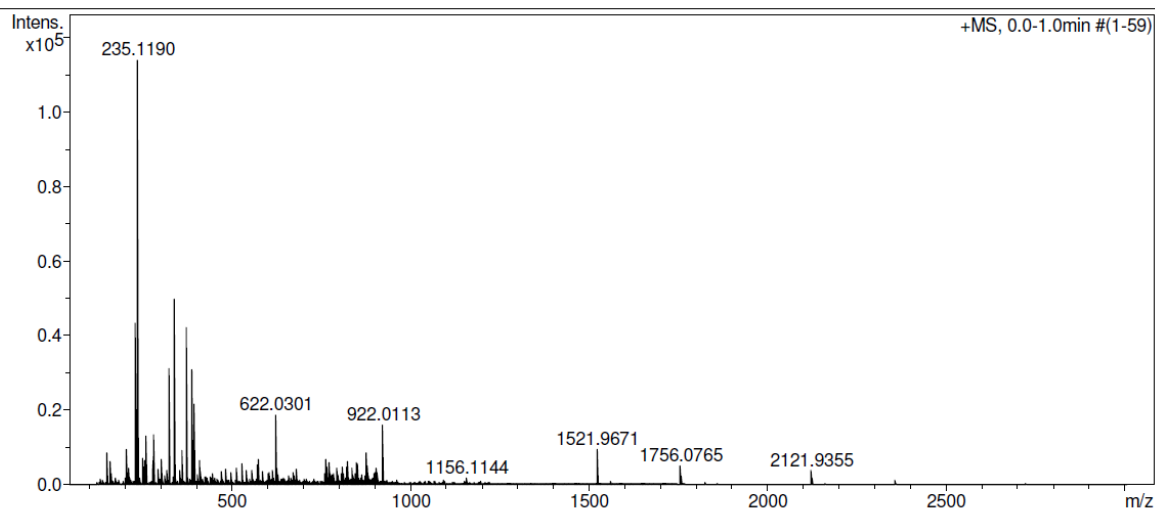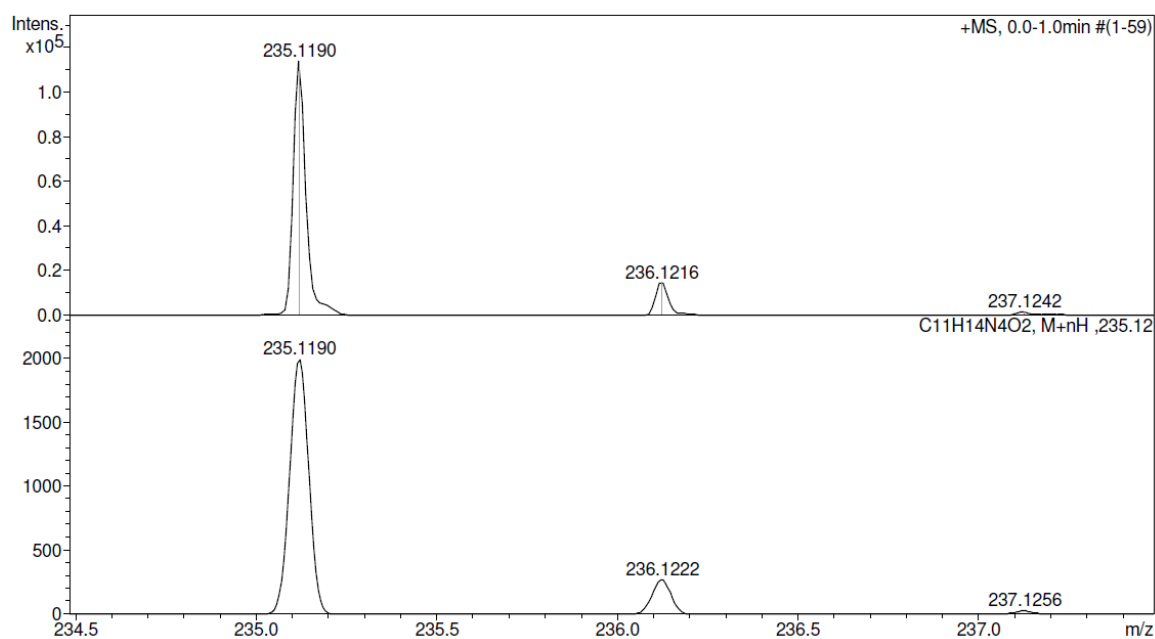

# HRMS spectrum of compound **15**

## Display Report

### Analysis Info

Analysis Name D:\Data\Chizhov\IMB\Matyugina\Oct\_21\_2022\In-268\_&clblow.d  
 Method tune\_low.m  
 Sample Name 15  
 Comment 100 %, dil. 2000, calibrant added

Acquisition Date 21.10.2022 14:16:23  
 Operator BDAL@DE  
 Instrument / Ser# micrOTOF CH3CN 10248

### Acquisition Parameter

|             |            |                      |          |                  |           |
|-------------|------------|----------------------|----------|------------------|-----------|
| Source Type | ESI        | Ion Polarity         | Positive | Set Nebulizer    | 0.4 Bar   |
| Focus       | Not active |                      |          | Set Dry Heater   | 180 °C    |
| Scan Begin  | 50 m/z     | Set Capillary        | 4500 V   | Set Dry Gas      | 4.0 l/min |
| Scan End    | 3000 m/z   | Set End Plate Offset | -500 V   | Set Divert Valve | Waste     |

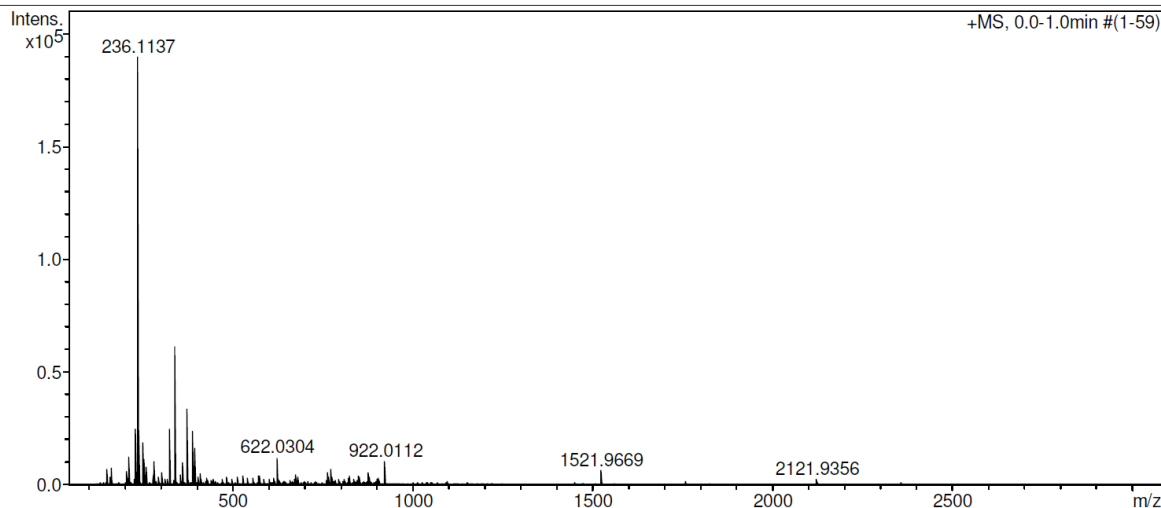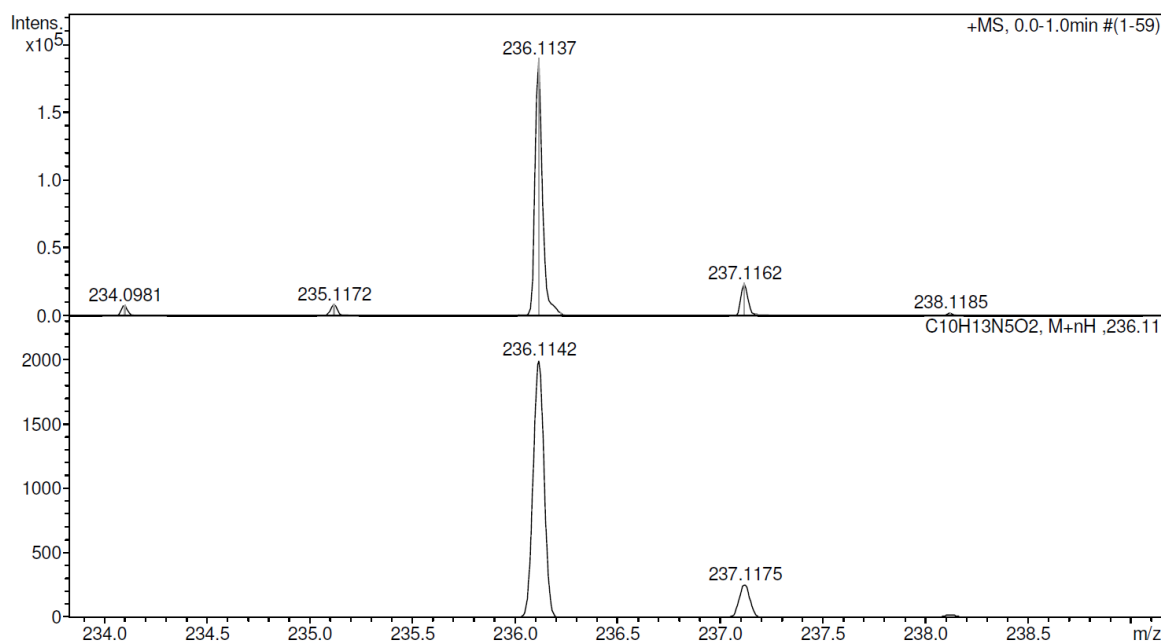



# HRMS spectrum of compound **16**

## Display Report

### Analysis Info

Analysis Name D:\Data\Chizhov\IMB\Matyugina\Oct\_21\_2022\In-300\_&clblow.d Acquisition Date 21.10.2022 14:24:08  
 Method tune\_low.m Operator BDAL@DE  
 Sample Name 16 Instrument / Ser# micrOTOF CH3CN 10248  
 Comment 100 %, dil. 200, calibrant added

### Acquisition Parameter

|             |            |                      |          |                  |           |
|-------------|------------|----------------------|----------|------------------|-----------|
| Source Type | ESI        | Ion Polarity         | Positive | Set Nebulizer    | 0.4 Bar   |
| Focus       | Not active |                      |          | Set Dry Heater   | 180 °C    |
| Scan Begin  | 50 m/z     | Set Capillary        | 4500 V   | Set Dry Gas      | 4.0 l/min |
| Scan End    | 3000 m/z   | Set End Plate Offset | -500 V   | Set Divert Valve | Waste     |

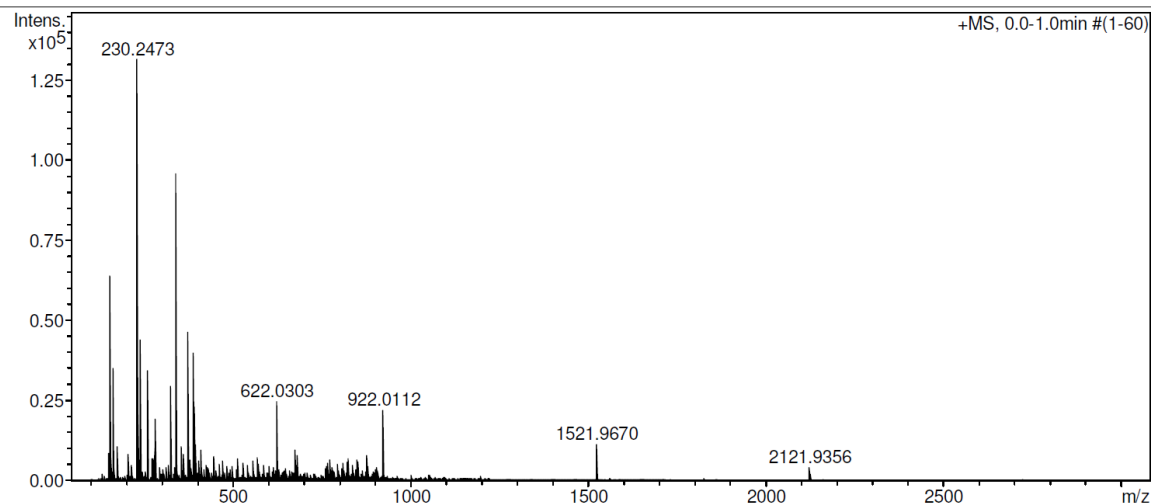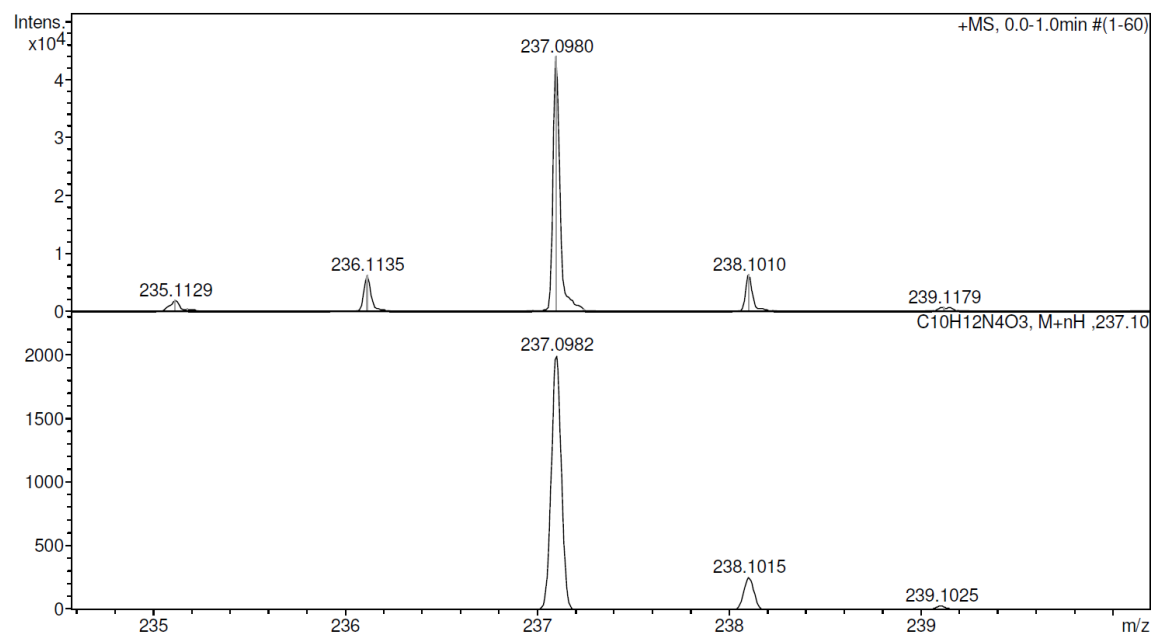

**Figure S1.** Lineweaver–Burk plots for the inosine phosphorolysis at concentrations of compounds 1, 2, 3 and 4 equal to 0, 0.5, 1 and 2 mM. (A) compound 1, (B) compound 2, (C) compound 3, (D) compound 4.

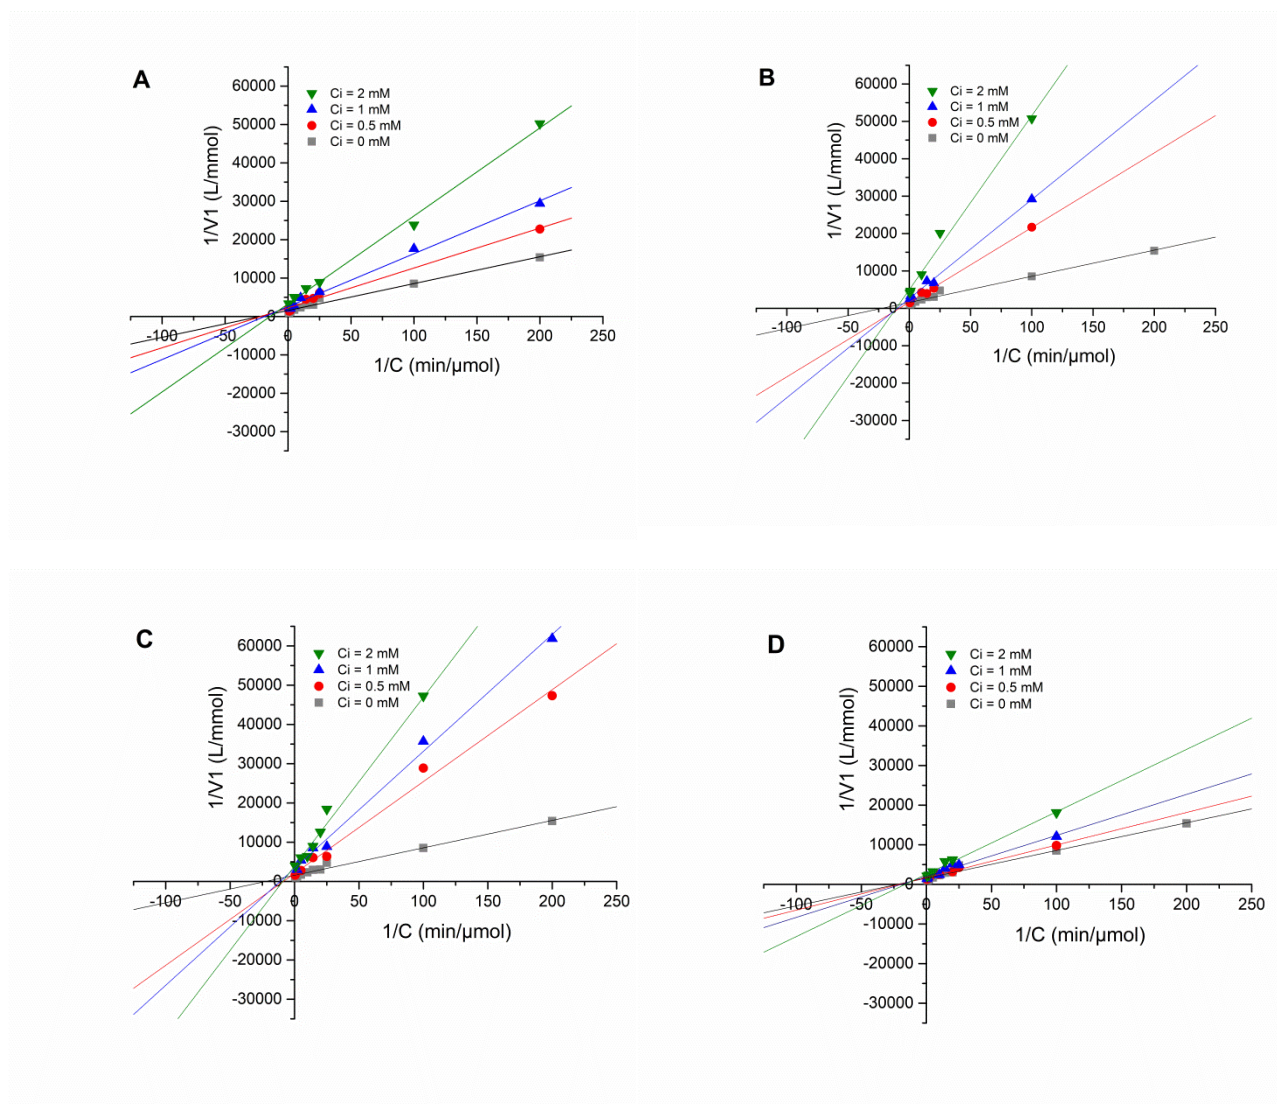

**Figure S2.** 2D diagrams of complexes PNP with various type of ligands.

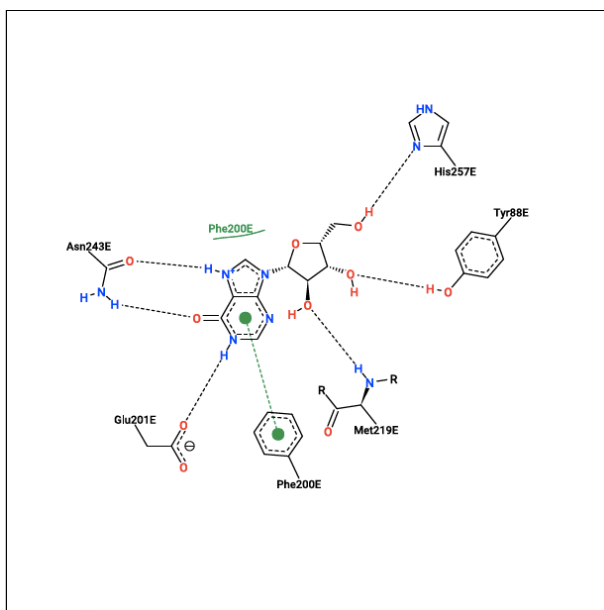

Complex with inosine (PDB ID code 1RCT)

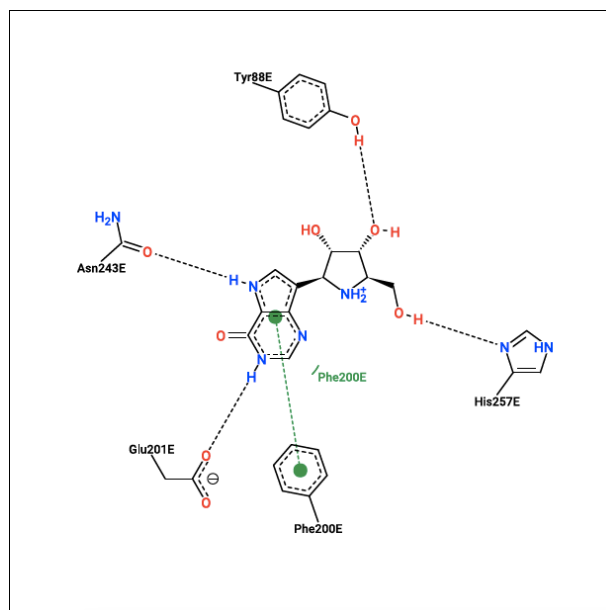

Complex with Immucillin H (PDB ID code 1PF7)

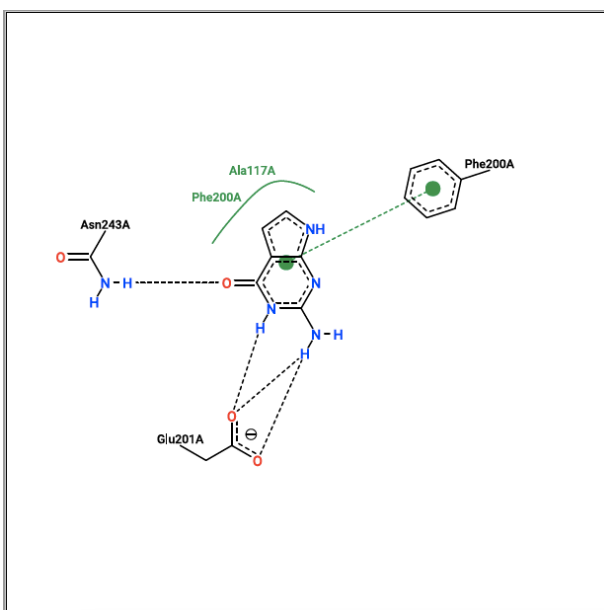

Complex with 7-deazaguanine. (PDB ID code 3INY)

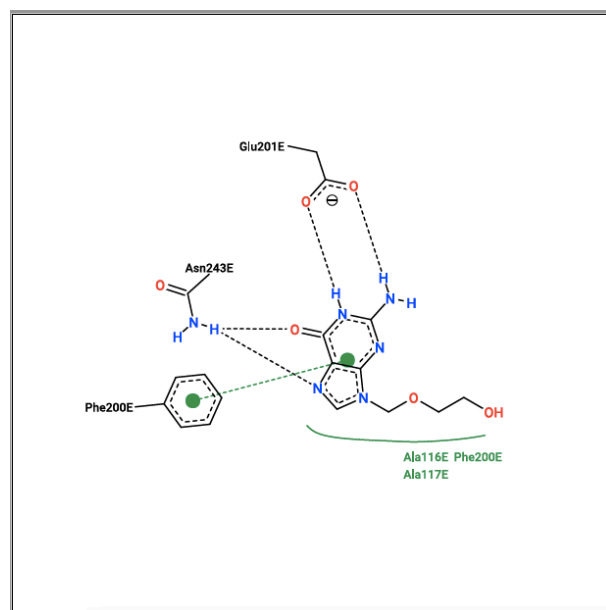

Complex with acyclovir (PDB ID code 1PWY)

**Figure S3.** Structure of the 3INY with re-docked 7-deazaguanine (An overlap the red wire – native ligand from PDB database; the red stick docked ligand. The box for docking ligands was highlighted in green ( $12 \text{ \AA} \times 10 \text{ \AA} \times 10 \text{ \AA}$ .)

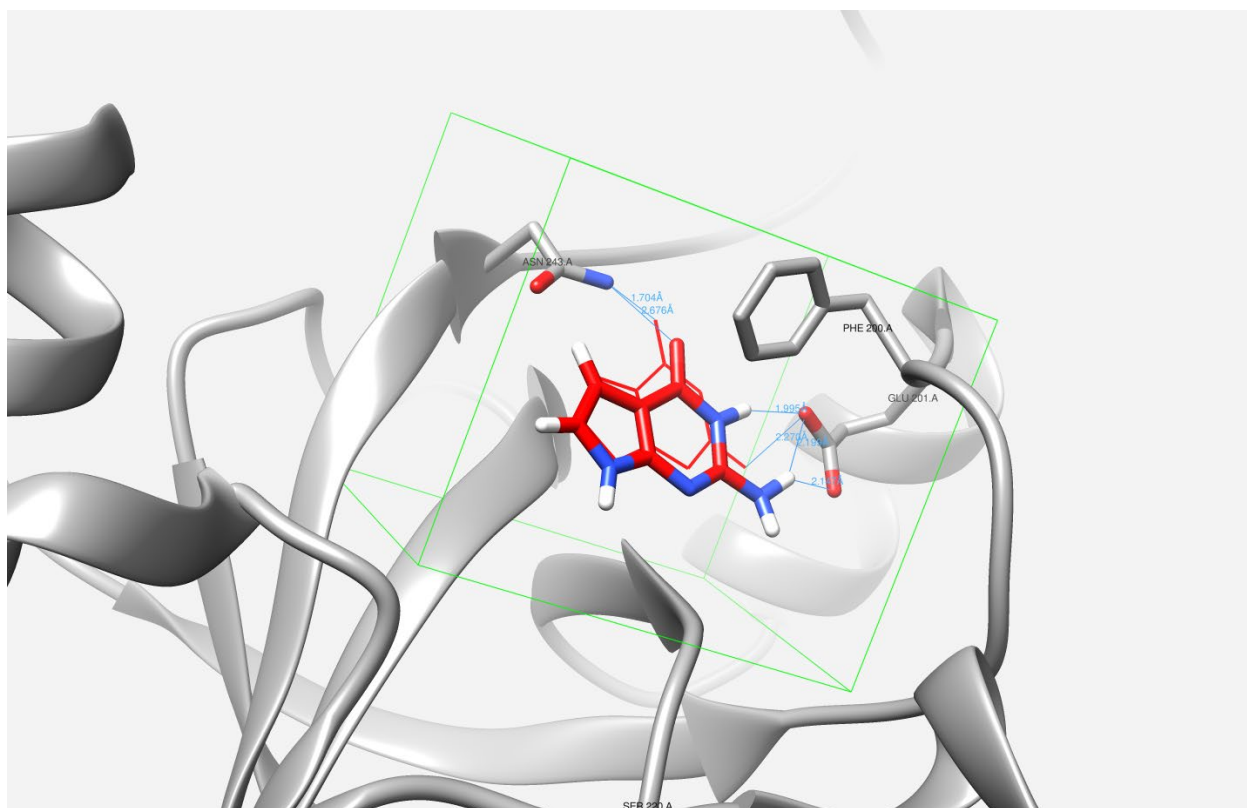

Supplement: s1 [file s1]
